1 **Paladin is a PI(4,5)P<sub>2</sub> phosphoinositide phosphatase that regulates endosomal signaling**  
2 **and angiogenesis**

3

4 Anja Nitzsche<sup>1§#</sup>, Riikka Pietilä<sup>1§</sup>, Chiara Testini<sup>1§#</sup>, Takeshi Ninchoji<sup>1</sup>, Ross O. Smith<sup>1</sup>,  
5 Elisabet Ekvärn<sup>1#</sup>, Jimmy Larsson<sup>1#</sup>, Francis P. Roche<sup>1</sup>, Isabel Egaña<sup>1</sup>, Suvi Jauhiainen<sup>1</sup>,  
6 Philipp Berger<sup>2</sup>, Lena Claesson-Welsh<sup>1</sup> and Mats Hellström<sup>1\*</sup>

7

8 <sup>1</sup>Science for Life Laboratory, Department of Immunology, Genetics and Pathology, The  
9 Rudbeck Laboratory, Uppsala University, Uppsala, Sweden; <sup>2</sup>Paul-Scherrer Institute,  
10 Laboratory of Nanoscale Biology, Villigen-PSI, Switzerland

11

12 §These authors contributed equally to this work.

13

14 \*Address correspondence to Mats Hellström: mats.hellstrom@igp.uu.se

15

16 #Present address: Anja Nitzsche, Paris Cardiovascular Research Center, INSERM U970, Paris,  
17 France; Chiara Testini, Division of Nephrology, Department of Medicine, Boston Children's  
18 Hospital, Boston, MA, USA; Elisabet Ekvärn, Cepheid AB, Solna, Sweden; Jimmy Larsson,  
19 Department of Cell and Molecular Biology, Uppsala University, Uppsala, Sweden

20

21 Key words: Paladin, VEGFR2, phosphoinositide, phosphatase, endocytosis

22

23 **ABSTRACT**

24 Cell signaling governs cellular behavior and is therefore subject to tight spatiotemporal  
25 regulation. Signaling output is regulated by specialized cell membranes and vesicles which  
26 contain unique combinations of lipids and proteins. The phospholipid phosphatidylinositol 4,5-  
27 bisphosphate, (PI(4,5)P<sub>2</sub>), an important component of the plasma membrane as well as other  
28 subcellular membranes, is involved in multiple processes, including signaling. However, which  
29 enzymes drive the formation and degradation of non-plasma membrane PI(4,5)P<sub>2</sub>, and their  
30 impact on cell signaling and function at the organismal level are unknown. Here we show in a  
31 mouse model that Paladin is a vascular PI(4,5)P<sub>2</sub> phosphatase that regulates endosomal  
32 signaling and angiogenesis. Paladin was localized to the endosomal and Golgi compartments,  
33 and interacted with vascular endothelial growth factor receptor 2 (VEGFR2) *in vitro* and *in*  
34 *vivo*. Loss of Paladin resulted in increased internalization of the receptor, over-activation of  
35 extracellular regulated kinase, and hypersprouting of endothelial cells in the developing retina  
36 of mice. These findings suggest that inhibition of Paladin, or other endosomal PI(4,5)P<sub>2</sub>  
37 phosphatases, could be exploited to modulate VEGFR2 signaling and angiogenesis, when direct  
38 and full inhibition of the receptor is not desirable.

## 39 INTRODUCTION

40 In the eukaryotic cell, membranes in different subcellular compartments play distinct roles in  
41 cell signaling. Growth factor receptor signaling is initiated at the cell surface and continues after  
42 internalization and during endosome trafficking (Lampugnani, Orsenigo et al. 2006, Simons,  
43 Gordon et al. 2016). However, signaling is quantitatively and qualitatively distinct dependent  
44 on the specialized membrane compartment (Di Paolo and De Camilli 2006). Key to the  
45 maintenance of membrane specialization are lipid kinases and phosphatases that specifically  
46 phosphorylate/dephosphorylate phospholipids with an inositol head group i.e.  
47 phosphoinositides (PI). PIs are specifically distributed to generate ‘membrane codes’ on  
48 intracellular vesicles and the plasma membrane (Di Paolo and De Camilli 2006, Lemmon  
49 2008). These PIs together with Rab GTPases are required for the maintenance and coordination  
50 of endocytosis and membrane trafficking (Jean and Kiger 2012) through recruitment of effector  
51 proteins to assemble specific endocytic complexes (Botelho, Efe et al. 2008, Jin, Chow et al.  
52 2008, Lemmon 2008, Chagpar, Links et al. 2010, Mizuno-Yamasaki, Medkova et al. 2010).  
53 Consequently, as lipid kinases and phosphatases are key regulators of membrane identity and  
54 function, they are also regulators of cell signaling. However, the kinases and phosphatases  
55 involved in the generation of the specific PIs at distinct subcellular localizations are still not  
56 fully identified and their roles at the organismal level are only partially known.

57

58 PIs are phosphorylated at the 3', 4', and 5' position of the inositol ring, giving rise to seven  
59 different PI species. The main PIs in the plasma membrane, early endosomes, late endosomes,  
60 and the Golgi apparatus are PI(4,5)P<sub>2</sub>, PI(3)P, PI(3,5)P<sub>2</sub>, and PI(4)P, respectively (Tan, Thapa  
61 et al. 2015). These PI pools present in microdomains of membrane vesicles provide a unique  
62 environment for signaling and sorting (Tan, Thapa et al. 2015).

63

64 Growth factor signaling is initiated at the plasma membrane, where the major PI pool is  
65 PI(4,5)P<sub>2</sub> (Watt, Kular et al. 2002). PI(4,5)P<sub>2</sub> is essential for signaling as a substrate for PI-3-  
66 kinase and the subsequent generation of the second messenger PI(3,4,5)P<sub>3</sub> (Bilanges, Posor et  
67 al. 2019). PI(4,5)P<sub>2</sub> is also present in intracellular membranes, as demonstrated by immune-EM  
68 and further suggested by the presence of lipid kinases and phosphatases, for which PI(4,5)P<sub>2</sub> is  
69 as a substrate or product. An important role for PI(4,5)P<sub>2</sub> dephosphorylation has been identified  
70 in growth factor receptor internalization and sorting in early endosomes. For example, PI(4,5)P<sub>2</sub>  
71 generated by type I gamma phosphatidylinositol phosphate 5-kinase i5 (PIPKIγ<sub>5</sub>) regulates  
72 sorting of endosomal epidermal growth factor receptor (EGFR). PIPKIγ<sub>5</sub>-deficiency results in  
73 reduced transition of EGFR from endosomes to lysosomes and prolonged signaling (Sun,  
74 Hedman et al. 2013). However, a more general role for PI(4,5)P<sub>2</sub> phosphatases has not been  
75 fully investigated.

76

77 Paladin is a membrane-associated protein encoded by *Pald1* or *x99384/mKIAA1274* in mouse  
78 and *PALDI* or *KIAA1274* in human. Its expression is primarily restricted to endothelial cells  
79 during development (Wallgard, Larsson et al. 2008, Suzuki, Moriya et al. 2010, Wallgard,  
80 Nitzsche et al. 2012). Although Paladin contains a phosphatase domain, it reportedly lacks  
81 protein phosphatase activity and was thus suggested to be a catalytically inactive  
82 pseudophosphatase (Huang, Hancock et al. 2009, Roffers-Agarwal, Hutt et al. 2012, Kharitidi,  
83 Manteghi et al. 2014, Reiterer, Eysers et al. 2014). However, Paladin has been implicated in  
84 various cell signaling pathways. A broad phenotypic screen in *Pald1 null* mice covering all  
85 organ systems revealed a specific lung phenotype, i.e. an emphysema-like lung histology and  
86 increased turnover of lung endothelial cells (Egana, Kaito et al. 2017). In addition, embryonic

87 studies in chicken support a role for Paladin in neural crest migration (Roffers-Agarwal, Hutt  
88 et al. 2012). Cell culture studies suggest that Paladin negatively regulates expression and  
89 phosphorylation of the insulin receptor, as well as the phosphorylation of the downstream  
90 serine/threonine kinase AKT (Huang, Hancock et al. 2009). Furthermore, Paladin is a negative  
91 regulator of Toll-like receptor 9 (TLR9) signaling (Li, Wang et al. 2011). Collectively, these  
92 observations suggest that Paladin is an important player in cell signaling. Nevertheless, the  
93 mechanism whereby Paladin achieves those effects on diverse signaling pathways is unknown.

94

95 Here we provide evidence that Paladin is a novel PI(4,5)P<sub>2</sub> phosphatase that lacks phospho-  
96 tyrosine/serine/threonine phosphatase activity. Paladin expression in endothelial cells regulates  
97 Vascular Endothelial Growth Factor Receptor 2 (VEGFR2) signaling at the level of endosomal  
98 trafficking. Vascular Endothelial Growth factor A (VEGF-A)/VEGFR2 signaling is essential  
99 for coordinating angiogenesis (Simons, Gordon et al. 2016). Consequently, genetic ablation of  
100 Paladin leads to retinal endothelial hypersprouting during development and excessive  
101 pathological angiogenesis. This suggests that targeting Paladin or other PI(4,5)P<sub>2</sub> phosphatases  
102 could be explored to modulate VEGFR2 signaling.

## 103 RESULTS

### 104 **Paladin is a PI(4,5)P<sub>2</sub> phosphatase localized in endosomal vesicles**

105 Paladin is considered to be a catalytically inactive pseudophosphatase. This is partially based  
106 on the sequence comparison to known protein phosphatases (PTP). The Paladin amino acid  
107 sequence contains four repeats of the minimal PTP consensus sequence CX<sub>5</sub>R (Figure 1a)  
108 (Wallgard, Nitzsche et al. 2012). Two of these repeats share high similarity with the extended  
109 conserved signature motif for PTP active sites, but importantly Paladin lacks the conserved  
110 histidine residue preceding the CX<sub>5</sub>R motif (Suppl Figure 1a) (Andersen, Mortensen et al.  
111 2001). However, an increasing number of PTPs are recognized as being able to catalyze the  
112 dephosphorylation of phosphoinositides (Pulido, Stoker et al. 2013) and several new candidate  
113 phospholipid phosphatases have been proposed, including Paladin (Alonso and Pulido 2015).  
114 We therefore used a colorimetric screen based on the release of free phosphate from the  
115 substrate to evaluate such phosphatase activity of Paladin. We expressed and immuno-  
116 precipitated V5-tagged Paladin and phosphatase and tensin homolog (PTEN) proteins in  
117 HEK293 cells. Wild-type PTEN and dephosphorylation of PI(3,4,5)P<sub>3</sub> was used as positive  
118 control and the C124S phosphatase-dead PTEN variant as negative control. Similarly, we used  
119 a Paladin variant with a Cys to Ser (C/S) substitution of all four cysteines in the CX<sub>5</sub>R motifs  
120 as a negative control (Suppl Figure 1a). Indeed, wild-type Paladin showed specific phosphatase  
121 activity towards PI(4,5)P<sub>2</sub>, and tended to also dephosphorylate PI(3,4,5)P<sub>3</sub> but not PI  
122 monophosphates or inositol phosphates (Figure 1b and Suppl Figure 1b). Further, using  
123 radioactively labelled phosphopeptide substrate, with TC-PTP as a positive control, we  
124 confirmed the data by Huang and co-workers that Paladin lacks phospho-tyrosine activity  
125 (Figure 1c) (Huang, Hancock et al. 2009). Similarly, no Paladin activity against PKC-  
126 phosphorylated peptide was apparent (Suppl Figure 1c). These observations supported  
127 phospholipid phosphatase activity of Paladin.

128

129 Paladin is mainly expressed in endothelial cells during development (Wallgard, Nitzsche et al.  
130 2012) . Accordingly, we used immunostaining to evaluate the cellular location of Paladin in  
131 primary human dermal microvascular endothelial cells (HDMEC). The analysis revealed a  
132 vesicular staining pattern of Paladin but no staining of the plasma membrane and no co-  
133 localization with the junctional protein VE-cadherin was observed (Figure 1d,e and Suppl  
134 Figure 1d). We hypothesized that vesicular membrane localization could be facilitated by the  
135 N-terminal Paladin myristoylation, (Suzuki, Moriya et al. 2010), and that selective membrane  
136 localization could be enhanced by binding to phosphoinositides. We therefore tested the binding  
137 of Paladin to various phosphoinositides. We found that recombinant Paladin did indeed bind  
138 specifically to monophosphoinositides PI(3)P, PI(4)P, and PI(5)P, and PI(3,5)P<sub>2</sub> (Suppl Figure  
139 1e). This might reflect Paladin's localization: e.g. PI(4)P is present in the Golgi membrane  
140 (Choudhury, Hyvola et al. 2005) and, accordingly, Paladin co-localized with PI(4)P and the  
141 Golgi marker giantin (Figure 1d and Suppl Figure 1f). This indicated that Paladin was localized  
142 to specific vesicular structures in the endothelial cells but not the plasma membrane.

143

144 To further characterize the subcellular localization of Paladin, we analyzed its localization in  
145 HDMEC expressing fluorescently tagged Rab4, -7, and -11, markers of fast recycling, slow  
146 recycling and late endosomes, respectively. Paladin co-localized mainly with Rab4 and Rab11.  
147 Super-resolution microscopy revealed that one-quarter of the Rab4- or Rab11-positive  
148 structures were also positive for Paladin, with Paladin seemingly localizing in sub-domains on  
149 Rab-positive vesicles (Figure 1e). Paladin also co-localized with Rab7-positive late endosomes,  
150 but not with EEA1 early endosomes (Suppl Figure 1g,h).

151

152 Taken together, Paladin catalyzes PI(4,5)P<sub>2</sub> dephosphorylation but lacks phosphatase activity  
153 towards phosphorylated amino acid residues. Further, it co-localizes with the endosomal  
154 markers Rab4, -7, and -11, and Golgi membrane, but not the plasma membrane.

155

### 156 **Paladin regulates VEGFR2 internalization**

157 Paladin is highly expressed in the vasculature, and regulates endothelial proliferation and  
158 survival in the lung (Wallgard, Nitzsche et al. 2012, Egana, Kaito et al. 2017). VEGF-A and its  
159 main receptor VEGFR2 are essential regulators of endothelial cell function and therefore we  
160 hypothesized that Paladin might interact with VEGFR2. We thus tested the effect of endothelial  
161 cell treatment with VEGF-A on Paladin and VEGFR2 localization *in vitro* and *in vivo*. We  
162 observed the formation of a Paladin-VEGFR2 complex in response to VEGF-A treatment both  
163 *in vitro* (in primary endothelial cells) and *in vivo* (in a mouse model). This interaction was  
164 further stabilized with blocking dephosphorylation by peroxyvanadate treatment (Figure 2a-c).  
165 Accordingly, super-resolution microscopy analysis confirmed VEGF-A induced co-  
166 localization of Paladin and VEGFR2 (Figure 2d). This indicated that Paladin could be involved  
167 in VEGF-A/VEGFR2 signaling.

168

169 To validate a role for Paladin in VEGFR2 signaling, Paladin expression was silenced in  
170 endothelial cells. Interestingly, siRNA-mediated knockdown of *PALDI* in HDMEC resulted in  
171 a 35-51% increase of the total basal VEGFR2 pool (*PALDI* siRNA #1 (95% CI 19-51% p-  
172 value <0.05, siRNA #2 95% CI 21-81%, p<0,001) (Suppl Figure 2a). However, the receptor  
173 was degraded at the same rate as control-treated cells after VEGF-A stimulation (Figure 2e,  
174 Suppl Figure 2b). To study the effect of the presence and absence of Paladin on the trafficking  
175 of surface VEGFR2, we treated endothelial cells, in which *PALDI* expression had been silenced  
176 and non-silenced cells, with VEGF-A for different time periods. We then used surface



177 biotinylation to pull down VEGFR2 using streptavidin separating the cell surface-localized  
178 VEGFR2 pool from the internal pool. When normalized to total VEGFR2 levels, the amount of  
179 VEGFR2 at the cell surface in control and *PALDI* siRNA-treated cells was not significantly  
180 different after VEGF-A treatment (Figure 2e,f and Suppl Figure 2c). In a parallel analysis, we  
181 evaluated the size of the internalized VEGFR2 pool over time, after stripping the cell-surface  
182 biotin-labelled VEGFR2 pool. After 15-min treatment with VEGF-A and normalization to total  
183 VEGFR2, the internalized VEGFR2 pool in *PALDI*-silenced endothelial cells was almost twice  
184 that of the control culture (Figure 2g,h and Suppl Figure 2d). This suggested that Paladin  
185 controls the rate of VEGFR2 internalization at the early time points after VEGF-A stimulation.

186  
187 Finally, we stained *PALDI* siRNA-treated cells for the presence of VEGFR2 and the early  
188 endosome marker EEA1, tracking the appearance and disappearance of VEGFR2 over time as  
189 a way to indirectly assess the movement of VEGFR2 through the early endosome compartment.  
190 A similar proportion of VEGFR2<sup>+</sup> vesicles co-localized with EEA1 10 min after VEGF-A  
191 stimulation in silenced and control cells, while fewer VEGFR2<sup>+</sup> vesicles co-localized with  
192 EEA1 30 min after the stimulation in *PALDI*-silenced cells than in control cells (Figure 2i,j and  
193 Suppl Figure 2e-f). This suggested that VEGFR2 moved more quickly through the early  
194 endosome compartments after VEGF-A stimulation in the absence of Paladin.

195  
196 Collectively, these analyses indicated that Paladin acts as a negative regulator of VEGFR2  
197 internalization and early endosome transport upon VEGF-A stimulation.

198  
199 **Loss of Paladin leads to increased ERK1/2 phosphorylation downstream of VEGFR2**  
200 Having shown that Paladin plays a role in VEGFR2 trafficking in response to VEGF-A, we  
201 next wished to explore whether VEGFR2 signaling was affected by the loss of *PALDI*.

202 Accordingly, we investigated the effect of *PALDI* silencing on the phosphorylation of various  
203 molecules involved in the VEGF-A/VEGFR2 signaling in HDMEC. In keeping with a more  
204 efficient internalization of the receptor after VEGF-A stimulation of HDMEC, phosphorylation  
205 of VEGFR2 normalized to total VEGFR2 was enhanced in *PALDI* siRNA-treated cells after  
206 VEGF-A stimulation compared with non-silenced cells (Figure 3a,b). Furthermore, the  
207 phosphorylation of certain downstream targets of VEGFR2: mitogen-activated protein kinase  
208 (MAPK)3/MAPK1 (ERK1/2) and SRC were increased in silenced HDMEC (Figure 3 c,d and  
209 Suppl Figure 3a), while there was no significant difference in the phosphorylation of another  
210 downstream target AKT (Suppl Figure 3b). These observations indicated that distinct pathways  
211 downstream of VEGFR2 were hyper activated in the absence of Paladin in HDMEC.

212

213 We next investigated the loss of *Pald1* on VEGFR2 signaling *in vivo*. We examined murine  
214 cardiac endothelial cells as an example of microcirculatory endothelial cells responsive to  
215 VEGF-A. Furthermore, heart endothelial cells express *Pald1* and, in contrast with the lung  
216 endothelial cells, they do not show an overt phenotype in the *Pald1*<sup>-/-</sup> mouse (Wallgard,  
217 Nitzsche et al. 2012, Egana, Kaito et al. 2017, Tabula Muris, Overall et al. 2018). Accordingly,  
218 we injected VEGF-A into the tail vein of adult mice, isolated the hearts at predetermined time  
219 points and analyzed signaling proteins by western blot. Compared with the wild-type *Pald1*  
220 mouse, VEGFR2 degradation was delayed in *Pald1*<sup>-/-</sup> heart lysates, which manifested as less  
221 degradation 5–10 min after VEGF-A stimulation. 15–20 min after VEGF-A stimulation  
222 *Pald1*<sup>+/+</sup> VEGFR2 levels were equivalent to *Pald1*<sup>-/-</sup> (Figure 3e,f). Furthermore, downstream  
223 signaling in the *Pald1*<sup>-/-</sup> hearts was altered. After VEGF-A stimulation, Mapk3/Mapk1 (Erk1/2)  
224 phosphorylation was increased and prolonged in *Pald1*<sup>-/-</sup> mice compared with the wild-type  
225 littermates (Figure 3e,g). Other downstream mediators of VEGFR2 signaling also appeared to  
226 be aberrantly activated in *Pald1*<sup>-/-</sup>. However, we did not observe statistically significant

227 differences in the level of phosphorylation of phospholipase (PLC)  $\gamma$ , Akt, or Src in response  
228 to VEGF-A *in vivo* in *Pald1*<sup>-/-</sup> compared to wild-type littermates (Figure 3h-j and Suppl Figure  
229 3c).

230 Taken together, loss of Paladin function *in vitro* and *in vivo* results in altered activation and  
231 degradation of VEGFR2, and increased Erk1/2 signaling downstream of VEGFR2.

232

### 233 **Endothelial hypersprouting in the *Pald1*-deficient postnatal retina results from** 234 **exaggerated Erk1/2 signaling**

235 Retinal endothelial cells proliferate and migrate in a VEGF-A/VEGFR2-dependent and highly  
236 stereotyped manner during early postnatal development (Gerhardt, Golding et al. 2003). We  
237 therefore investigated the consequence of *Pald1* gene inactivation on blood vessel development  
238 of early postnatal retinas in mice. We observed a reduced vascular outgrowth in the *Pald1*<sup>-/-</sup>  
239 retina, with the most prominent effect at postnatal day (P) 5 (Figure 4a,b). Further, filopodia  
240 and tip cell numbers were higher in the *Pald1*<sup>-/-</sup> mouse (Figure 4c,d and Suppl Figure 4a,b). In  
241 addition, the density of the vascular front in *Pald1*<sup>-/-</sup> P5 retina was greater in both the capillaries  
242 and around veins, as compared to the littermate control retina (Figure 4 e,f). These observations  
243 indicated that Paladin is a negative regulator of angiogenic sprouting. Furthermore, in  
244 agreement with an increased pErk1/2 accumulation in response to VEGF-A stimulation, as  
245 detected by immunoblotting of *Pald1*<sup>-/-</sup> hearts (Figure 3e,g), the area of vascular Erk1/2  
246 immunostaining was enhanced in the *Pald1*<sup>-/-</sup> retina (Figure 4g,h). Since cyclin D1 is a  
247 transcriptional target downstream of pErk1/2, we also examined the expression and localization  
248 of this protein in the retina. The analysis confirmed nuclear staining of cyclin D1 in endothelial  
249 cells and increased levels of the *Ccnd1* mRNA in *Pald1*<sup>-/-</sup> retina compared with the levels in  
250 littermate control retinas (Figure 4i,j). To study whether the observed phenotypes in the *Pald1*<sup>-/-</sup>  
251 retina could be due to increased Erk1/2 signaling, we employed an inhibitor of MAP2K1

252 (MEK), a Ser/Tyr/Thr kinase upstream of Erk. Notably, Erk1/2 phosphorylation in P5 retina  
253 was reduced in a time-dependent manner after a single intraperitoneal dose with the MEK  
254 inhibitor U0126 (Suppl Figure 4c). We observed that treatment with the MEK inhibitor U0126  
255 normalized the vascular outgrowth and endothelial tip cell numbers in *Pald1*<sup>-/-</sup> retinas, which  
256 underscored the contribution of the exaggerated Erk1/2 signaling to the observed phenotype  
257 (Figure 4k,l). Collectively, these observations suggested that Paladin is a negative regulator of  
258 Erk1/2 signaling and endothelial sprouting and that the hypersprouting phenotype seen in  
259 *Pald1*<sup>-/-</sup> retinas can be normalized by inhibition of MEK activity in the early postnatal retina in  
260 mouse.

261

### 262 **Absence of *Pald1* leads to increased pathological retinal angiogenesis**

263 Pathological retinal angiogenesis is induced in hypoxia and VEGF-A is a known driver of the  
264 pathology in such diseases as wet age-related macular degeneration, where VEGF-A blockade  
265 is an important treatment (Mitchell 2011). Since we identified a role for Paladin in regulating  
266 endothelial sprouting and VEGF-A/VEGFR2 signaling, we decided to investigate the  
267 importance of *Pald1* in pathological retinal angiogenesis. We utilized an oxygen-induced  
268 retinopathy (OIR) model in mice to trigger vaso-oblivation and compensatory pathological  
269 angiogenesis (Connor, Kraah et al. 2009). We used the *Pald1*<sup>+LacZ</sup> mouse to track activation of  
270 *Pald1* transcription. We observed strong endothelial LacZ expression in the retinal vasculature  
271 and in pathological blood vessels in the *Pald1*<sup>+LacZ</sup> retina following OIR (Figure 5a). Indeed,  
272 VEGF-A induced production of the Paladin protein in endothelial cells *in vitro* and in the retinal  
273 vasculature *in vivo*, as indicated by LacZ reporter expression (Figure 5b,c and Suppl Figure 5a).  
274 In addition, mice lacking *Pald1* exhibited increased vascular tuft formation at P17, but showed  
275 no difference in avascular area, compared with wild-type mice following OIR (Figure 5d-f and  
276 Suppl Figure 5b). Of note, we did not observe any differences in the vascular leakage in wild-

277 type and *Pald1*<sup>-/-</sup> after OIR, based on microsphere extravasation, or in the phosphorylation of  
278 the endothelial adherens junction protein VE-cadherin (VEC) in the vascular tufts at P17 (Suppl  
279 Figure 5c–f). Hence, expression of Paladin could be upregulated by VEGF-A and loss of  
280 Paladin specifically affected pathological vascular tuft formation in the OIR model but did not  
281 affect vascular integrity. In addition, as observed at the early developmental stage, pErk1/2  
282 immunostaining intensity was increased in the vasculature at P15 in *Pald1*<sup>-/-</sup> retinas compared  
283 to *Pald1*<sup>+/+</sup> in the OIR model (Figure 5g,h).

284

285 Taken together, Paladin is upregulated by VEGF-A, which is the main driver of pathological  
286 retinal angiogenesis in mouse and human, and in the OIR model Paladin functions as a negative  
287 regulator of pathological angiogenesis.

## 288 **DISCUSSION**

289 In this study, we explored the signaling role of Paladin. We show here for the first time that  
290 Paladin binds to and dephosphorylates phosphoinositides. Paladin was localized to Rab4, -7,  
291 and -11, and Golgi membranes, and was thus positioned to act as a regulator of endosomal  
292 phosphoinositide content and, thereby, endosomal trafficking. Furthermore, loss of *Pald1*  
293 expression led to enhanced VEGFR2 internalization after VEGF-A stimulation, rapid  
294 trafficking of VEGFR2 through early endosomes, and increased pERK1/2 levels *in vitro* and *in*  
295 *vivo*. Phenotypically, *Pald1* deficiency resulted in retinal endothelial hypersprouting, which  
296 could be normalized by inhibition of MEK, and enhanced pathological retinal angiogenesis.  
297 Our data suggest that Paladin is a part of a VEGF-driven negative feedback loop in retinal  
298 angiogenesis where VEGF-A upregulates Paladin which acts to dampen VEGFR2 driven  
299 signaling and endothelial sprouting. Through inhibition of Paladin one could potentially  
300 activate VEGF-A/VEGFR2 signaling in e.g. situations of insufficient angiogenesis.

301  
302 Despite the lack of published experimental evidence, Paladin had been postulated to be a  
303 catalytically inactive pseudophosphatase (Huang, Hancock et al. 2009, Kharitidi, Manteghi et  
304 al. 2014, Reiterer, Eyers et al. 2014). However, more recently, Alonso and Pulido suggested  
305 that Paladin is a Cys-based phosphatase, which forms its own subclass (IV). Whereas all the  
306 neighboring phosphatase subclasses dephosphorylate phosphoinositides, they proposed, based  
307 on structural similarity, that Paladin might possess inositol phosphatase activity (Alonso and  
308 Pulido 2015). Indeed, we have demonstrated in this study that Paladin, while also binding  
309 monophosphoinositides and PI(3,5)P<sub>2</sub>, preferentially dephosphorylates PI(4,5)P<sub>2</sub> lipids, but not  
310 other phosphoinositides or inositol phosphates. As has been shown for PTEN, the lipid-binding  
311 specificity might serve to localize Paladin to particular trafficking vesicles (Naguib, Bencze et  
312 al. 2015). Based on the presented findings, we propose that Paladin controls endosomal

313 vesicular trafficking in endothelial cells by modifying the lipid membrane of intracellular  
314 vesicles. In line with this hypothesis, Paladin was localized to endosomal vesicles, co-localized  
315 with Rab4, -7, and -11 positive vesicles, and also appeared in close association with the Golgi  
316 membranes. As one possibility, based on the substrate preference and combined with the  
317 subcellular localization of Paladin, the protein might bind PI(3,5)P<sub>2</sub> in late endosomes, and  
318 control the levels of PI(4,5)P<sub>2</sub> in sorting or recycling endosomes (Tan et al JCS 2015). However,  
319 further studies are needed to formally verify this.

320 Paladin appears to be a PI(4,5)P<sub>2</sub> phosphatase with a specific biological function, as has also  
321 been observed for other PI(4,5)P<sub>2</sub> phosphatases, which have similar substrate specificity but  
322 play distinct biological roles. For example, syntaptojanins, endocytic PI(4,5)P<sub>2</sub> phosphatases,  
323 appear to play a role in neurological functions such as synaptic vesicle recycling and loss of  
324 function leads to neurological disorders and seizures in both mice and humans (Dyment, Smith  
325 et al. 2015, Nakatsu, Messa et al. 2015), while OCRL1, a PI(5)P phosphatase, is mainly  
326 involved in the development of eye, brain and kidney (Attree, Olivos et al. 1992). We have  
327 previously shown that Paladin is essential for normal lung development as female mice exhibit  
328 an emphysema-like phenotype and show increased turnover of endothelial cells in the lung  
329 (Egana, Kaito et al. 2017). In addition, we have now demonstrated that Paladin is involved in  
330 retinal vascular development and pathology. Further research will be needed to both dissect  
331 substrate specificity at subcellular resolution and also to connect it with physiological roles at  
332 the organismal level for PI(4,5)P<sub>2</sub> phosphatases to understand, ultimately, how enzymes with  
333 the same substrate specificity act in concert to regulate potent signaling lipids.

334  
335 Paladin appears to play a unique VEGF-A–regulated role by affecting VEGFR2 trafficking and  
336 signaling. Indeed, we observed that following VEGF-A stimulation, VEGFR2 was more rapidly  
337 internalized, with enhanced ERK1/2 phosphorylation, in *PALDI* silenced cells than in the

338 control cells. Disruption of VEGFR2 trafficking has also been shown to occur in Synectin  
339 deficiency. Synectin null mice exhibit altered VEGFR2 signaling and insufficient arterial  
340 formation as a consequence of prolonged trafficking through early endosomes which allows for  
341 increased VEGFR2 dephosphorylation at pTyr1173 by tyrosine-protein phosphatase non-  
342 receptor type 1 (PTP1b) and reduced pERK1/2 (Lanahan, 2010). Hence, in the absence of  
343 *Pald1*, the rapid internalization of VEGFR2 may allow its escape from dephosphorylation by  
344 PTP1b and, thereby, increased pERK1/2 levels. Alternatively, VEGFR2 might recycle back to  
345 the plasma membrane and initiate another round of phosphorylation in the absence of Paladin.  
346 In line with this, we also observed increased pTyr1173 phosphorylation in HDMEC but did not  
347 compare it to the levels of other VEGFR2 phosphosites. Future studies could address the  
348 possible time- and phospho-site specific effect of Paladin loss-of-function and the association  
349 of specific tyrosine phosphatases to VEGFR2 to address the similarities and differences  
350 between Paladin and Synectin loss of function.

351

352 Retinal angiogenic sprouting is driven by VEGF-A/VEGFR2 signaling (Gerhardt, Golding et  
353 al. 2003), which is regulated by receptor internalization and subcellular localization (Gaengel  
354 and Betsholtz 2013, Nakayama, Nakayama et al. 2013, Simons, Gordon et al. 2016). We  
355 observed hyperphosphorylation of Erk1/2 as well as hypersprouting in the *Pald1* knockout  
356 retina and in pathological vessels in the OIR. This is in line with the observation that Erk1/2 is  
357 one important downstream mediator of angiogenic sprouting; it was recently shown that Erk1/2  
358 signaling is both necessary and sufficient for endothelial tip cell sprouting in zebrafish (Shin,  
359 Beane et al. 2016). However, signaling alterations in the *Pald1*<sup>-/-</sup> retina are likely more complex,  
360 as defective endosomal trafficking not only affects VEGFR2 but most likely also other  
361 signaling molecules. Nevertheless, we observed normalization of the increased endothelial tip  
362 cell numbers and vascular outgrowth defects in the *Pald1* knockout retina upon MEK inhibitor



363 treatment, underscoring the role of Erk1/2 activation as an important part of the signaling  
364 defects in *Pald1*-deficient endothelial cells. Recently, *PALDI* has been genetically associated  
365 with Moyamoya disease in two families. Moyamoya disease is caused by the occlusion of the  
366 carotid artery and its branches, causing a characteristic pronounced collateral vessel formation  
367 and stroke in the central nervous system (Grangeon, Guey et al. 2019). A potential causal link  
368 between the hyperactive endothelial signaling observed in the *Pald1*<sup>-/-</sup> mouse and excessive  
369 collateral formation in patients with Moyamoya disease should be studied further.

370

371 Based on the evidence presented herein, we propose that Paladin is a critical regulator of  
372 VEGFR2 endosomal trafficking. Potentially, Paladin might also regulate the activity of other  
373 membrane proteins and receptors. Indeed, Paladin interacts with TLR9, an entirely endosomal  
374 signaling receptor, and reduced Paladin expression leads to blunted TLR9 signaling (Li, Wang  
375 et al. 2011). Paladin has also been identified as a negative regulator of insulin receptor signaling,  
376 and *PALDI* deficiency leads to increased insulin receptor levels and increased AKT  
377 downstream signaling (Huang, Hancock et al. 2009). Considering the diversity of receptors  
378 affected by Paladin, its activity as a phosphoinositide phosphatase may be a common  
379 denominator of such general role in membrane protein trafficking and signaling.

380

381 In conclusion, we have demonstrated that Paladin is a VEGF-A-inducible lipid phosphatase  
382 that regulates endothelial sprouting and VEGFR2 trafficking and signaling, likely exerting its  
383 effects by controlling the level of phosphoinositides in the sorting/recycling endosomal  
384 compartment. Therapeutic targeting of VEGFR2 signaling indirectly via the inhibition of PI  
385 phosphatases such as Paladin might be a way to modify of VEGFR2 signaling that is not  
386 achievable by targeting the receptor directly. For example inhibition of Paladin, or other lipid

387 phosphatases, could be used to enhance VEGFR2 signaling to promote angiogenic sprouting in  
388 situation of insufficient angiogenesis.

389

390

391

## 392 **ACKNOWLEDGEMENTS**

393 We thank Kurt Ballmer-Hofer for kindly sharing canine VEGF-A<sub>164</sub>. We thank Elisabetta  
394 Dejana for the kind gift of pY685 VE-cadherin antibodies. We thank Carina Hellberg  
395 (deceased), Katie Bentley, and Andrew Philippides for valuable discussion and input. High-  
396 resolution SIM images, bright field, and fluorescent images were acquired at the SciLife Lab  
397 BioVis Platform at The Rudbeck Laboratory, Uppsala University, Sweden. This work was  
398 supported by the Swedish Cancer Foundation, Beijer Foundation, Åke Wiberg's Foundation,  
399 Magnus Bergwall's Foundation, and Swedish Research Council (E.E., L.C.-W.); Knut and  
400 Alice Wallenberg Foundation (L.C.-W.); and Gustav Adolf Johansson Foundation (J.L., I.E.).

401

## 402 **AUTHOR CONTRIBUTIONS**

403 Experimental design, generation, and analysis of data: A.N., R.P. C.T., T.N., R.O.S., E.E., J.L.,  
404 F.P.R., I.E., S.J., L.C.-W., M. H. Manuscript figure assembly: A.N., R.P., C.T. Reagents: P.B.  
405 Supervision: M.H. Manuscript writing: A.N., R.P., C.T., P.B., L.C.-W., M.H.

## 406 **COMPETING INTERESTS**

407 The authors declare no competing interests.

## 408 **REFERENCES**

409 Alonso, A. and R. Pulido (2015). "The extended human PTPome: a growing tyrosine phosphatase family." The FEBS  
410 journal.

- 411 Andersen, J. N., O. H. Mortensen, G. H. Peters, P. G. Drake, L. F. Iversen, O. H. Olsen, P. G. Jansen, H. S. Andersen, N. K.  
412 Tonks and N. P. Moller (2001). "Structural and evolutionary relationships among protein tyrosine phosphatase domains."  
413 *Mol Cell Biol* **21**(21): 7117-7136.
- 414 Attree, O., I. M. Olivios, I. Okabe, L. C. Bailey, D. L. Nelson, R. A. Lewis, R. R. McInnes and R. L. Nussbaum (1992). "The  
415 Lowe's oculocerebrorenal syndrome gene encodes a protein highly homologous to inositol polyphosphate-5-phosphatase."  
416 *Nature* **358**(6383): 239-242.
- 417 Bilanges, B., Y. Posor and B. Vanhaesebroeck (2019). "PI3K isoforms in cell signalling and vesicle trafficking." *Nat Rev*  
418 *Mol Cell Biol* **20**(9): 515-534.
- 419 Botelho, R. J., J. A. Efe, D. Teis and S. D. Emr (2008). "Assembly of a Fab1 phosphoinositide kinase signaling complex  
420 requires the Fig4 phosphoinositide phosphatase." *Molecular biology of the cell* **19**(10): 4273-4286.
- 421 Chagpar, R. B., P. H. Links, M. C. Pastor, L. A. Furber, A. D. Hawrysh, M. D. Chamberlain and D. H. Anderson (2010).  
422 "Direct positive regulation of PTEN by the p85 subunit of phosphatidylinositol 3-kinase." *Proceedings of the National*  
423 *Academy of Sciences of the United States of America* **107**(12): 5471-5476.
- 424 Choudhury, R. R., N. Hyvola and M. Lowe (2005). "Phosphoinositides and membrane traffic at the trans-Golgi network."  
425 *Biochem Soc Symp*(72): 31-38.
- 426 Connor, K. M., N. M. Krahe, R. J. Dennison, C. M. Aderman, J. Chen, K. I. Guerin, P. Sapieha, A. Stahl, K. L. Willett and L.  
427 E. Smith (2009). "Quantification of oxygen-induced retinopathy in the mouse: a model of vessel loss, vessel regrowth and  
428 pathological angiogenesis." *Nat Protoc* **4**(11): 1565-1573.
- 429 Di Paolo, G. and P. De Camilli (2006). "Phosphoinositides in cell regulation and membrane dynamics." *Nature* **443**(7112):  
430 651-657.
- 431 Dyment, D. A., A. C. Smith, P. Humphreys, J. Schwartztruber, C. L. Beaulieu, F. C. Consortium, D. E. Bulman, J.  
432 Majewski, J. Woulfe, J. Michaud and K. M. Boycott (2015). "Homozygous nonsense mutation in SYNJ1 associated with  
433 intractable epilepsy and tau pathology." *Neurobiol Aging* **36**(2): 1222 e1221-1225.
- 434 Egana, I., H. Kaito, A. Nitzsche, L. Becker, C. Ballester-Lopez, C. Niaudet, M. Petkova, W. Liu, M. Vanlandewijck, A.  
435 Vernaleken, T. Klopstock, H. Fuchs, V. Gailus-Durner, M. Hrabe de Angelis, H. Rask-Andersen, H. J. Johansson, J. Lehtio,  
436 L. He, A. O. Yildirim, M. Hellstrom and C. German Mouse Clinic (2017). "Female mice lacking Pald1 exhibit endothelial  
437 cell apoptosis and emphysema." *Sci Rep* **7**(1): 15453.
- 438 Gaengel, K. and C. Betsholtz (2013). "Endocytosis regulates VEGF signalling during angiogenesis." *Nat Cell Biol* **15**(3):  
439 233-235.
- 440 Gerhardt, H., M. Golding, M. Fruttiger, C. Ruhrberg, A. Lundkvist, A. Abramsson, M. Jeltsch, C. Mitchell, K. Alitalo, D.  
441 Shima and C. Betsholtz (2003). "VEGF guides angiogenic sprouting utilizing endothelial tip cell filopodia." *The Journal of*  
442 *cell biology* **161**(6): 1163-1177.
- 443 Grangeon, L., S. Guey, J. C. Schwitalla, F. Bergametti, M. Arnould, M. Corpechot, J. Hadjadj, F. Riant, C. Aloui, S. Drunat,  
444 D. Vidaud, E. Tournier-Lasserre and M. Kraemer (2019). "Clinical and Molecular Features of 5 European Multigenerational  
445 Families With Moyamoya Angiopathy." *Stroke* **50**(4): 789-796.
- 446 Huang, S. M., M. K. Hancock, J. L. Pitman, A. P. Orth and N. Gekakis (2009). "Negative regulators of insulin signaling  
447 revealed in a genome-wide functional screen." *PLoS One* **4**(9): e6871.
- 448 Jean, S. and A. A. Kiger (2012). "Coordination between RAB GTPase and phosphoinositide regulation and functions." *Nat*  
449 *Rev Mol Cell Biol* **13**(7): 463-470.
- 450 Jin, N., C. Y. Chow, L. Liu, S. N. Zolov, R. Bronson, M. Davisson, J. L. Petersen, Y. Zhang, S. Park, J. E. Duex, D.  
451 Goldowitz, M. H. Meisler and L. S. Weisman (2008). "VAC14 nucleates a protein complex essential for the acute  
452 interconversion of PI3P and PI(3,5)P(2) in yeast and mouse." *The EMBO journal* **27**(24): 3221-3234.
- 453 Kharitidi, D., S. Manteghi and A. Pause (2014). "Pseudophosphatases: methods of analysis and physiological functions."  
454 *Methods* **65**(2): 207-218.
- 455 Lampugnani, M. G., F. Orsenigo, M. C. Gagliani, C. Tacchetti and E. Dejana (2006). "Vascular endothelial cadherin controls  
456 VEGFR-2 internalization and signaling from intracellular compartments." *J Cell Biol* **174**(4): 593-604.
- 457 Lemmon, M. A. (2008). "Membrane recognition by phospholipid-binding domains." *Nature reviews. Molecular cell biology*  
458 **9**(2): 99-111.
- 459 Li, S., L. Wang, M. Berman, Y. Y. Kong and M. E. Dorf (2011). "Mapping a dynamic innate immunity protein interaction  
460 network regulating type I interferon production." *Immunity* **35**(3): 426-440.
- 461 Mitchell, P. (2011). "A systematic review of the efficacy and safety outcomes of anti-VEGF agents used for treating  
462 neovascular age-related macular degeneration: comparison of ranibizumab and bevacizumab." *Curr Med Res Opin* **27**(7):  
463 1465-1475.
- 464 Mizuno-Yamasaki, E., M. Medkova, J. Coleman and P. Novick (2010). "Phosphatidylinositol 4-phosphate controls both  
465 membrane recruitment and a regulatory switch of the Rab GEF Sec2p." *Developmental cell* **18**(5): 828-840.
- 466 Naguib, A., G. Bencze, H. Cho, W. Zheng, A. Tocilj, E. Elkayam, C. R. Faehnle, N. Jaber, C. P. Pratt, M. Chen, W. X. Zong,  
467 M. S. Marks, L. Joshua-Tor, D. J. Pappin and L. C. Trotman (2015). "PTEN functions by recruitment to cytoplasmic  
468 vesicles." *Mol Cell* **58**(2): 255-268.
- 469 Nakatsu, F., M. Messa, R. Nandez, H. Czaplá, Y. Zou, S. M. Strittmatter and P. De Camilli (2015). "Sac2/INPP5F is an  
470 inositol 4-phosphatase that functions in the endocytic pathway." *J Cell Biol* **209**(1): 85-95.
- 471 Nakayama, M., A. Nakayama, M. van Lessen, H. Yamamoto, S. Hoffmann, H. C. Drexler, N. Itoh, T. Hirose, G. Breier, D.  
472 Vestweber, J. A. Cooper, S. Ohno, K. Kaibuchi and R. H. Adams (2013). "Spatial regulation of VEGF receptor endocytosis  
473 in angiogenesis." *Nat Cell Biol* **15**(3): 249-260.
- 474 Pulido, R., A. W. Stoker and W. J. Hendriks (2013). "PTPs emerge as PIPs: protein tyrosine phosphatases with lipid-  
475 phosphatase activities in human disease." *Human molecular genetics* **22**(R1): R66-76.

- 476 Reiterer, V., P. A. Eysers and H. Farhan (2014). "Day of the dead: pseudokinases and pseudophosphatases in physiology and  
477 disease." *Trends Cell Biol* **24**(9): 489-505.
- 478 Roffers-Agarwal, J., K. J. Hutt and L. S. Gammill (2012). "Paladin is an antiphosphatase that regulates neural crest cell  
479 formation and migration." *Developmental biology* **371**(2): 180-190.
- 480 Roffers-Agarwal, J., K. J. Hutt and L. S. Gammill (2012). "Paladin is an antiphosphatase that regulates neural crest cell  
481 formation and migration." *Dev Biol* **371**(2): 180-190.
- 482 Shin, M., T. J. Beane, A. Quillien, I. Male, L. J. Zhu and N. D. Lawson (2016). "Vegfa signals through ERK to promote  
483 angiogenesis, but not artery differentiation." *Development* **143**(20): 3796-3805.
- 484 Simons, M., E. Gordon and L. Claesson-Welsh (2016). "Mechanisms and regulation of endothelial VEGF receptor  
485 signalling." *Nat Rev Mol Cell Biol* **17**(10): 611-625.
- 486 Sun, Y., A. C. Hedman, X. Tan, N. J. Schill and R. A. Anderson (2013). "Endosomal type Igamma PIP 5-kinase controls  
487 EGF receptor lysosomal sorting." *Dev Cell* **25**(2): 144-155.
- 488 Suzuki, T., K. Moriya, K. Nagatoshi, Y. Ota, T. Ezure, E. Ando, S. Tsunasawa and T. Utsumi (2010). "Strategy for  
489 comprehensive identification of human N-myristoylated proteins using an insect cell-free protein synthesis system."  
490 *Proteomics* **10**(9): 1780-1793.
- 491 Tabula Muris, C., c. Overall, c. Logistical, c. Organ, processing, p. Library, sequencing, a. Computational data, a. Cell type,  
492 g. Writing, g. Supplemental text writing and i. Principal (2018). "Single-cell transcriptomics of 20 mouse organs creates a  
493 Tabula Muris." *Nature* **562**(7727): 367-372.
- 494 Tan, X., N. Thapa, S. Choi and R. A. Anderson (2015). "Emerging roles of PtdIns(4,5)P<sub>2</sub>--beyond the plasma membrane." *J*  
495 *Cell Sci* **128**(22): 4047-4056.
- 496 Wallgard, E., E. Larsson, L. He, M. Hellstrom, A. Armulik, M. H. Nisancioglu, G. Genove, P. Lindahl and C. Betsholtz  
497 (2008). "Identification of a core set of 58 gene transcripts with broad and specific expression in the microvasculature."  
498 *Arterioscler Thromb Vasc Biol* **28**(8): 1469-1476.
- 499 Wallgard, E., A. Nitzsche, J. Larsson, X. Guo, L. C. Dieterich, A. Dimberg, T. Olofsson, F. C. Ponten, T. Makinen, M. Kalen  
500 and M. Hellstrom (2012). "Paladin (X99384) is expressed in the vasculature and shifts from endothelial to vascular smooth  
501 muscle cells during mouse development." *Dev Dyn* **241**(4): 770-786.
- 502 Watt, S. A., G. Kular, I. N. Fleming, C. P. Downes and J. M. Lucocq (2002). "Subcellular localization of phosphatidylinositol  
503 4,5-bisphosphate using the pleckstrin homology domain of phospholipase C delta1." *Biochem J* **363**(Pt 3): 657-666.

504

1 **Figure 1. Paladin is a lipid phosphatase.**

2 **(a)** Schematic of Paladin protein depicting the four putative phosphatase domains (white boxes,  
3 CX<sub>5</sub>R; X: any amino acid; mouse: amino acids 121–127, 160–166, 315–321, and 664–670;  
4 human: amino acids 118–124, 157–163, 312–318, and 661–667). Phosphatase domains  
5 predicted by Interpro (black box) and SCOP SUPERFAMILY algorithm (grey). A full-length  
6 phosphatase-dead variant with the four cysteine residues substituted for serine (C/S).

7 **(b)** Lipid phosphatase activity of Paladin, wild-type and phosphatase-dead C/S mutant, towards  
8 PI(4,5)P<sub>2</sub> and PI(3,4,5)P<sub>3</sub> substrates. Positive control; wild-type phosphatase and tensin  
9 homolog (PTEN); negative control; lipid phosphatase-dead C124S PTEN. Mean±SEM,  
10 unpaired *t*-test. n=3 individual experiments.

11 **(c)** *In vitro* radioactive phosphatase assay using Paladin, wild-type or C/S variant,  
12 immunoprecipitated from HEK293, and as a substrate, Src-optimized peptide phosphorylated  
13 on tyrosines. Immunoprecipitates from cells transfected with empty vector or endogenous TC-  
14 PTP served as negative and positive controls. Data were normalized to <sup>32</sup>P input. Mean±SEM.  
15 n=3.

16 **(d)** Co-localization of Paladin and PI(4)P in HDMEC treated with VEGF-A-treated (50 ng/ml;  
17 30 min) and immunostained for the presence of PI(4)P (green) and giantin (red), showing PI(4)P  
18 localization in the Golgi region (left panel). Analysis of non-treated HDMEC revealed partial  
19 co-localization of PI(4)P (green) and Paladin (red) (arrows in insert, right panel). Scale bars: 20  
20 μm.

21 **(e)** Representative image of Paladin co-localization with Rab vesicles shown by super-  
22 resolution microscopy of VEGF-A-treated HDMEC (50 ng/ml; 10 min), immunostained for  
23 the presence of Paladin (green) and recycling vesicle markers Rab4 (red, left) or Rab11 (red,  
24 right), after transduction of cells with Rab4-cherry and Rab11-cherry baculovirus, respectively.

25 Note the co-localization of Paladin and Rab4/Rab11 (yellow). Scale bars: 10  $\mu\text{m}$  and 0.5  $\mu\text{m}$   
26 (inset). n=5 (Rab4) and 10 (Rab11).

27

28 **Figure 2. Paladin interacts with VEGFR2 and regulates its endosomal trafficking.**

29 **(a,b)** Formation of VEGFR2/Paladin complex *in vitro*. Immunoprecipitation (IP) of V5-tagged  
30 Paladin (a) or VEGFR2 (b) from *PALDI*-overexpressing (a) or untransfected (b) HDMEC  
31 stimulated with 50 ng/ml VEGF-A (V) alone for 30 min (a) or in combination with phosphatase  
32 inhibitor 100  $\mu\text{M}$  peroxivanadate (PV) for 15 min (a,b,) and 30 min (b). Immunoblotting for  
33 Paladin, V5, and VEGFR2. IP with isotype control IgG as negative control (IgG con).

34 **(c)** Formation of VEGFR2/Paladin complex *in vivo*. IP of VEGFR2 from lysate of adult mouse  
35 lung retrieved 2 min after tail vein-injection of VEGF-A (0.25 $\mu\text{g/g}$  body weight),PV (50  $\mu\text{mol/g}$   
36 body weight) or PBS, and immunoblotting for Paladin and VEGFR2. IP with isotype control  
37 IgG as negative control (IgG con). Each lane represents lysate from one mouse lung.

38 **(d)** Representative image of co-localization (yellow) of Paladin (green) and VEGFR2 (red) in  
39 VEGF-A-treated HDMEC (50 ng/ml; 10 min), observed using super-resolution microscopy.  
40 Scale bars: 10  $\mu\text{m}$  and 0.5  $\mu\text{m}$  (inset). n=15.

41 **(e)** Cell surface VEGFR2 levels detected by cell surface biotinylation, using thiol-cleavable  
42 sulfo-NHS-SS-biotin, of HDMEC transfected with *PALDI* siRNA (#1 and #2) or non-targeting  
43 control ('c') siRNA, followed by VEGF-A stimulation (50 ng/ml) for indicated time periods.  
44 Total lysates and streptavidin (SA) pull down, immunoblotted for VEGFR2, Paladin, and actin.  
45 'No biotin', cells not treated with sulfo-NHS-SS-biotin.

46 **(f)** Quantification of data in (e). VEGFR2 surface levels (data pooled for the indicated time  
47 points) normalized to total VEGFR2 levels and compared between control and siRNA treated  
48 HDMEC. Mean $\pm$ SEM. n=4.

49 **(g)** Internalized pool of VEGFR2 after VEGF-A treatment (50 ng/ml) of non-transfected  
50 HDMEC (NT) or HDMEC transfected with *PALDI* siRNA (KD#1 and KD#2) or non-targeting  
51 control siRNA **(c)**. At indicated time points, remaining cell surface biotin was stripped and the  
52 internalized pool of VEGFR2 was collected by SA pull down. Immunoblotting of the total  
53 lysate verified *PALDI* siRNA-mediated knockdown.

54 **(h)** Quantification of data in (g). Data were normalized to total VEGFR2 levels in the lysate  
55 after subtraction of signals in biotinylated and stripped samples. Mean±SEM, *t*-test for  
56 individual time points, normalized to cntrl siRNA sample. n=3.

57 **(i)** Analysis of endosomal vesicles following *PALDI* knockdown. Representative images of  
58 VEGFR2 (red)/EEA1 (green) double-positive (yellow) vesicles in non-transfected, negative-  
59 control siRNA, and *PALDI* KD#2 siRNA-silenced HDMEC at 30 min of VEGF-A stimulation  
60 (50 ng/ml). DAPI in blue.

61 **(j)** Quantification of VEGFR2-EEA1 double-positive vesicles (left) and VEGFR2 vesicles  
62 (right). Mean±SEM, two-way ANOVA. n=4.

63

### 64 **Figure 3. Paladin regulates VEGFR2 signaling.**

65 **(a–d)** Signaling downstream of VEGF-A/VEGFR2 assessed in HDMEC, untreated, transfected  
66 with non-targeting siRNA (NT/cntrl), or with two different *PALDI*-targeting siRNAs (KD#1  
67 and KD#2), and treated with VEGF-A for 0-20 min. Immunoblotting of cell lysates for  
68 phosphorylated (p) VEGFR2 (pY1175), total VEGFR2, phosphorylated Erk1/2 (pT202 and  
69 pY204), and total Erk. Actin served as loading control. *PALDI* knockdown was verified by  
70 blotting for Paladin. Quantification of pVEGFR2 (normalized to total VEGFR2) (b) and  
71 pErk1/2 (normalized to total Erk1/2) (d). Mean±SEM, two-way ANOVA. n=3.

72 **(e–j)** Immunoblotting on total heart lysates from *PalDI*<sup>+/+</sup> and *PalDI*<sup>-/-</sup> mice, tail-vein injected  
73 with VEGF-A or PBS for the indicated time points, for Paladin, phosphorylated and total levels



74 of VEGFR2, phospholipase C $\gamma$  (PLC $\gamma$ ), Erk1/2, and Akt, and  $\beta$ 2-microglobulin ( $\beta$  2-MG,  
75 loading control) (e). Quantification of total VEGFR2 levels normalized to total loading control  
76 (f), pT202/pY204 Erk1/2 normalized to Erk1/2 (g) pY783 PLC $\gamma$  normalized to PLC $\gamma$  (h), pS473  
77 Akt normalized to Akt (i), pY416 Src family kinase (SFK) normalized to pY527 SFK (j). Blot  
78 for total c-Src is shown in Suppl. Figure 3c. Mean $\pm$ SEM, multiple *t*-test (Holm-Sidak for panel  
79 e), two-way ANOVA. n=4-5.

80

81 **Figure 4. Retinal vascular phenotype in *Pald1*<sup>-/-</sup> mouse.**

82 **(a, b)** Delayed vascular outgrowth and hyperdense vascular front in isolectin B4-positive P5  
83 retina from *Pald1*<sup>-/-</sup> mouse compared with *Pald1*<sup>+/+</sup> (a). Orange arrow indicates radial expansion  
84 of the vascular plexus in the *Pald1*<sup>+/+</sup> retina. Scale bar: 1 mm. Quantification of radial expansion  
85 (b) as shown in a) normalized to wild type litter mates. Mean $\pm$ SEM, unpaired *t*-test. n=14 litters,  
86 18 - 23 pups per genotype.

87 **(c,d)** Increased filopodia number in *Pald1*<sup>-/-</sup> mouse retina at vascular front, visualized by  
88 isolectin B4 staining (c). Scale bar: 50  $\mu$ m. Quantification of filopodia (d), normalized to wild  
89 type litter mates . Mean $\pm$ SEM, unpaired *t*-test. n=3 litters, 5-7 pups per genotype.

90 **(e,f)** P5 retina vascular front (isolectin B4, green) and endothelial nuclei (Erg, red) (e). Scale  
91 bar: 100  $\mu$ m. Magenta stippled square area quantified in (f). Vascular density was determined  
92 in the capillary bed (left) and in area around veins (right). Mean $\pm$ SEM, unpaired *t*-test. n=4  
93 litters, 9-12 pups per genotype.

94 **(g,h)** pT202/pY204 Erk1/2 immunostaining (black) in *Pald1*<sup>+/+</sup> and *Pald1*<sup>-/-</sup> P5 pups. Isolectin  
95 B4 (white) visualizes the entire vasculature. Scale bar: 100  $\mu$ m. Quantification of pT202/pY204  
96 Erk1/2 area (h) as in the black stippled square in g) (400 $\mu$ m from the retina rim), normalized to  
97 isolectinB4 area. Mean $\pm$ SEM, unpaired *t*-test. n=5 litters, 10-14 retinas per genotype.

98 **(i)** Representative images of cyclin D1 immunostaining in P5 retina showing nuclear cyclin D1  
99 (red) localization in retinal vessels (isolectin B4, white). Scale bar: 100  $\mu$ m.

100 **(j)** Quantitative real-time PCR analysis of the P4-P5 retinas. *Ccnd1* transcript levels, normalized  
101 to *Gapdh*. Mean $\pm$ SEM, unpaired *t*-test. n=10 *Pald1*<sup>+/+</sup> and 14 *Pald1*<sup>-/-</sup> pups.

102 **(k)** Quantification of relative radial expansion in vehicle (n=2 litters, 5 *Pald1*<sup>+/+</sup> and 4 *Pald1*<sup>-/-</sup>  
103 pups) and MEK inhibitor (U0126)-treated pups (n=4 litters, 7 *Pald1*<sup>+/+</sup> and 5 *Pald1*<sup>-/-</sup> pups).  
104 MEK inhibitor/vehicle was administered twice at 12h interval at P4 and eyes collected at P5.  
105 Each dot is one mouse. Mean $\pm$ SEM, one-way ANOVA. n=4–7.

106 **(l)** Quantification of the tip cell number in vehicle- (n=3 litters, 5 *Pald1*<sup>+/+</sup> and 5 *Pald1*<sup>-/-</sup> pups)  
107 and MEK inhibitor (U0126)-treated pups (n=3 litters, 5 *Pald1*<sup>+/+</sup> and 4 *Pald1*<sup>-/-</sup> pups). MEK  
108 inhibitor/vehicle administered twice at P5 at 2-h intervals, and eyes collected 2 h after the  
109 second injection. Each dot is one mouse. Mean $\pm$ SEM, one-way ANOVA.

110

111 **Figure 5. Paladin is induced by VEGF-A and regulates Erk phosphorylation in**  
112 **pathological angiogenesis.**

113 **(a)** Eyes from *Pald1*<sup>+/LacZ</sup> mice collected at P17 from untreated animals or animals with oxygen-  
114 induced retinopathy (OIR). *Pald1*-promoter driven *LacZ* expression and X-gal staining  
115 generated signals in capillaries, veins and arteries in the OIR retina at P17 compared to the  
116 normoxia control with predominantly arterial *LacZ* expression. Scale bar: 1 mm.

117 **(b)** Paladin levels in primary human umbilical vein endothelial cells (HUVEC) untreated or  
118 treated for 24 h with VEGF-A (50 ng/ml), FGF2 (50 ng/ml), or SDF1 $\alpha$  (30 ng/ml), and  
119 immunoblotting for Paladin and  $\beta$ -actin (loading control). Mean $\pm$ SEM, one way-ANOVA. n=5.

120 **(c)** Eyes from adult *Pald1*<sup>LacZ/+</sup> mice collected at 72 h after single-bolus intravitreal injection of  
121 1  $\mu$ g VEGF-A, and PBS in the contralateral eye, followed by X-gal staining. Arrow indicates

122 *Pald1* promoter activity in veins specifically after VEGF-A treatment. A, artery; V, vein. Scale  
123 bar: 100  $\mu$ m.

124 **(d-f)** Representative images of isolectin B4-stained P17 retinas from OIR-challenged *Pald1*<sup>+/+</sup>  
125 and *Pald1*<sup>-/-</sup> mice (detailed view in the insets). Scale bar: 1 mm. Quantification of neovascular  
126 tuft area (e) and avascular area (f). Each dot represents the mean of both retinas per mouse.  
127 Mean $\pm$ SEM, unpaired *t*-test. n=3 litters, 4 *Pald1*<sup>+/+</sup> and 3 *Pald1*<sup>-/-</sup> pups.

128 **(g)** Representative images of retina vasculature immunostained for isolectin B4 and  
129 pT202/pY204 Erk1/2 (pErk1/2). pErk1/2 staining within the vessels is also visualized using a  
130 16-color heatmap to display staining intensity. Scale bar: 30  $\mu$ m. **(h)** Quantification of ppErk1/2  
131 immunostaining as shown in g) within isolectin B4-positive vessels, as fold-change of pErk1/2  
132 stained area. Each dot represents the mean of both retinas per mouse. Mean $\pm$ SEM, unpaired *t*-  
133 test. n=3 litters, 5 *Pald1*<sup>+/+</sup> and 5 *Pald1*<sup>-/-</sup> pups.

134

135 **FIGURE SUPPLEMENTS**

136 **Supplementary Figure 1. Paladin lacks protein phosphatase activity *in vitro*.**

137 **(a)** Amino acid sequence alignment of the third (amino acids: mouse, 312–322; human, 309–  
138 319) and fourth (amino acids: mouse, 661–671; human, 658–668) putative phosphatase  
139 domains of Paladin with the consensus sequence of catalytic domain motif 9 of cysteine-based  
140 protein tyrosine phosphatases revealed Ser instead of His residue in front of the Cys in the  
141 phosphatase domains. By contrast, the phosphatase domain of vascular endothelial PTP (VE-  
142 PTP) contains the complete PTP motif.

143 **(b)** Screening of the phosphatase activity towards phosphoinositides and inositol phosphates of  
144 immunoprecipitated wild-type full-length Paladin and phosphatase-dead (C/S) mutant variant  
145 using an *in vitro* colorimetric molybdate dye assay. Commercial SHIP2 enzyme reaction buffer  
146 was used (Echelon, USA). Mean±SEM, n=3 replicates, one experiment.

147 **(c)** Immunoprecipitated full-length wild-type Paladin or its phosphatase-dead C/S variant  
148 expressed in HEK293 cells were analysed in an *in vitro* radioactive phosphatase assay using  
149 phosphorylated PKC-optimal peptide containing phosphoserine and phosphothreonine residues  
150 as a substrate. Immunoprecipitates of cells transfected with an empty vector served as a negative  
151 control. Data were normalized to <sup>32</sup>P input. Mean±SEM. n=7 for full-length Paladin and n=3  
152 for C/S Paladin variant (individual experiments).

153 **(d)** Representative image of co-localization of Paladin (green) and Vascular Endothelial  
154 Cadherin (VEC, red) shown by super-resolution microscopy of VEGF-A-treated HDMEC (50  
155 ng/ml; 10 min). Scale bar: 10 μm and 2 μm (inset). n=5.

156 **(e)** Paladin binds mono- and diphosphoinositides *in vitro*. Binding capacity of full-length GST-  
157 tagged Paladin to immobilized phosphoinositides was assessed using a PIP-array membrane.  
158 The amount of respective phosphoinositide is listed in pmol.

159 **(f)** Confocal representative image of HDMEC stained Paladin (green) and the Golgi apparatus  
160 marker giantin (red). Cells were treated with VEGF-A (50 ng/ml) for 10 min. Scale bar: 5  $\mu$ m.  
161 n=4.

162 **(g)** Confocal representative image of VEGF-A treated HDMEC (50 ng/ml; 10 min)  
163 immunostained for the presence of Paladin (green) and the lysosomal vesicle marker Rab7  
164 (red), after transduction with Rab7-cherry baculovirus. Note the co-localization of Paladin and  
165 Rab7 (yellow). Scale bars: 10  $\mu$ m and 2  $\mu$ m (inset). n=2.

166 **(h)** Confocal representative image of HDMEC stained for the presence of Paladin (green) and  
167 Early Endosome Antigen 1 (EEA1, red). Cells were treated with VEGF-A (50 ng/ml) for 10  
168 min. Scale bar: 10  $\mu$ m and 2  $\mu$ m (inset). n=4.

169

170 **Supplementary Figure 2. Paladin regulates VEGFR2 endosomal trafficking, total and**  
171 **internalized VEGFR2 levels after VEGF-A stimulation of HDMEC.**

172 **(a)** Total VEGFR2 was quantified in HDMEC treated with control siRNA (cntrl) or siRNA  
173 targeting *PALDI* (KD#1 or KD#2) for 72h. Mean $\pm$ SEM, one-way ANOVA. n=13.

174 **(b)** Total VEGFR2 was quantified in HDMEC treated with control siRNA ('c') or siRNA  
175 targeting *PALDI* (#1 or #2), as shown in Figure 2e. Time dependent degradation was observed  
176 after VEGF stimulation in both control and *PALDI* siRNA treated cells.

177 **(c)** Quantification of VEGFR2 surface levels in *PALDI*#KD1 cells from four independent  
178 experiments, as shown in Figure 2e. VEGFR2 surface levels (data pooled for the indicated time  
179 points) were normalized to total VEGFR2 levels in the lysate and compared between control  
180 and siRNA treated HDMEC. Mean $\pm$ SEM. n=4.

181 **(d)** Quantitative analysis of internalized VEGFR2, data from three individual experiments for  
182 *PALDI*#KD1, as shown in Figure 2g. Data were normalized to total VEGFR2 levels in the

183 lysate after subtraction of signals in biotinylated and stripped samples. Mean±SEM, *t*-test for  
184 individual time points, normalized to cntrl siRNA sample. n=3.

185 (e) Representative images of VEGFR2 (red)/EEA1 (green) double-positive vesicles (yellow) in  
186 non-transfected, negative-control siRNA, and *PALDI* KD#1 siRNA-silenced HDMEC after 30  
187 min of VEGF-A stimulation (50 ng/ml).

188 (f) Quantification of VEGFR2-EEA1 double-positive vesicles (left) and VEGFR2 vesicles  
189 (right). n=4. Mean±SEM, two-way ANOVA.

190

191 **Supplementary Figure 3. VEGF-A/VEGFR2 downstream signaling *in vitro* and *in vivo*.**

192 (a,b) HDMEC, untransfected (NT) or transfected with non-targeting (c/cntrl) or *PALDI*-  
193 targeting siRNA (KD #1, KD #2), were treated with VEGF-A for the indicated time periods.  
194 Immunoblots of cell lysates to determine protein levels of ACTIN, Paladin, pTyr416 and  
195 pTyr527 of Src family kinases (SFK) and total Src (a), pSer473 AKT, and total AKT (b), , are  
196 shown. Mean±SEM, two-way ANOVA. n=3.

197 (c) *Pald1*<sup>+/+</sup> and *Pald1*<sup>-/-</sup> mice were tail-vein injected with VEGF-A or PBS for the indicated  
198 time periods. Heart lysates were blotted to determine the phosphorylated and total levels of  
199 SFK. Quantification in Figure 3j. n=5 individual experiments.

200

201 **Supplementary Figure 4. Loss of *Pald1* leads to hypersprouting of the retinal vasculature.**

202 (a) Number of filopodia per 100-μm vascular front in the P5 retina stained with isolectin B4.  
203 Mean±SEM, unpaired *t*-test. n=3 litters, n=5-7 pups per genotype as indicated in graph.

204 (b) Nuclei of tip cells, defined as the front cells extending filopodia, at the vascular front of the  
205 P5 retina stained for endothelial cells (isolectin B4) and endothelial nuclei (Erg). Data for each  
206 litter were normalized to that of *Pald1*<sup>+/+</sup> littermates. Mean±SEM, unpaired *t*-test. n=4 litters,  
207 n=7-9 pups per genotype as indicated in graph.

208 (c) Western blot analysis of pT202/pY204 Erk1/2 levels in the P5 retina following a single  
209 intraperitoneal injection of MEK inhibitor U0126 (5 mg/kg), analyzed after the indicated time  
210 periods.

211

212 **Supplementary Figure 5. Paladin does not affect leakage or VE-cadherin phosphorylation**  
213 **in pathological retinal angiogenesis.**

214 (a) Immunoblotting for paladin in HUVEC, untreated or treated for 24 h with VEGF-A (50  
215 ng/ml), FGF2 (50 ng/ml), or SDF1 $\alpha$  (30 ng/ml), actin served as loading control. Quantification  
216 in Figure 5b. n=5.

217 (b) Representative images of isolectinB4 stained retina of P15 mouse during OIR development,  
218 showing similar levels of vessel dropout between the genotypes caused by hyperoxic conditions  
219 at P7–P12. Scale bar: 500  $\mu$ m. n=3 retinas per genotype

220 (c) Representative images of microsphere extravasation from neovascular tufts following  
221 intravenous injection of 25-nm fluorescent microspheres into mice that had been subjected to  
222 OIR. White arrows emphasize the extravascular accumulation of microspheres. Scale bar: 25  
223  $\mu$ m. n=3 litters, 4 pups per genotype.

224 (d) Quantification of microsphere extravasation in the *Pald1*<sup>+/+</sup> and *Pald1*<sup>-/-</sup> retinas at P17  
225 during OIR, as shown in c. Mean $\pm$ SEM, unpaired *t*-test. n=3 litters, 4 pups per genotype.

226 (e) Representative images of isolectin B4, Vascular endothelial cadherin (VEC), and pY685  
227 VEC immunostaining in the P17 retina of mice subjected to OIR. Scale bar: 50  $\mu$ m. n=3 litters,  
228 5-7 pups per genotype.

229 (f) Quantification of pY685 VEC in the *Pald1*<sup>+/+</sup> and *Pald1*<sup>-/-</sup> retina at P17 during OIR, as  
230 shown in e. Mean $\pm$ SEM, unpaired *t*-test. n=3 litters, 5-7 pups per genotype.

231

## 1 **ONLINE METHODS**

### 2 **Mice**

3 C57BL/6 mice with constitutive deletion of *Pald1* (Exon 1-18 replaced by a LacZ reporter cassette)  
4 have been generated<sup>1</sup> and backcrossed for at least 10 generations. *Pald1*<sup>+/-</sup> intercrosses were performed  
5 to generate homozygous and heterozygous littermates. All animal experiments were performed in  
6 compliance with the relevant laws and institutional guidelines and were approved by the Uppsala  
7 University board of animal experimentation.

8 MEK inhibitor U0126 (V1121, Promega) was injected intraperitoneally (5 mg/kg). For the short  
9 treatment, pups were injected twice at P5 with a two hour interval and eyes were collected two hours  
10 after the last injection. For the long treatment, pups were injected twice with a 12 h interval at P4 and  
11 retinas were collected for analyses at P5. As a vehicle, 40% DMSO in sterile 1xPBS was used.

12

### 13 **Statistical analysis**

14 Statistical analysis of two data sets was done by unpaired student's t-test (normal distribution of samples  
15 was verified) and of three data sets or more was done by one-way ANOVA GraphPad Prism6 and  
16 Prism7. Statistical significance is indicated as follows: \*  $p \leq 0.05$ , \*\*  $p \leq 0.01$ , \*\*\*  $p \leq 0.001$ .

17

### 18 **Cell culture and reagents**

19 HUVECs (ScienCell Research Laboratories) and HDMECs (PromoCell) were cultured in cell culture  
20 dishes coated with 1% gelatine using endothelial cell medium MV2 (PromoCell) with all supplements  
21 (5% FCS, 5 ng/ml hEGF, 0.5 ng/ml VEGF, 20 ng/ml R3 IGF, 1  $\mu\text{g}/\mu\text{l}$  ascorbic acid, 10 ng/ml bFGF and  
22 0.2  $\mu\text{g}/\mu\text{l}$  hydrocortisone) at 37°C and 5% CO<sub>2</sub>. Cells between four to six passages were used.

23 Cells were treated with the following reagents: 50 ng/ml mVEGF-A<sub>164</sub> (Peprotech), 50 ng/ml hVEGF-  
24 A<sub>165</sub> (Peprotech), 50 ng/ml rh FGF2 (RD systems), 30 ng/ml rh SDF1 $\alpha$  (ImmunoTools), 100  $\mu\text{M}$   
25 peroxyvanadate. HDMECs were starved for 2-6h or overnight in 0.1% FBS prior to growth factor  
26 stimulations.



27 To knock-down *PALDI* mRNA, semi-confluent HDMECs were transfected with siRNAs targeting  
28 *PALDI* (s25894, s25895, Ambion), or non-targeting siRNA (Stealth RNAi negative control, medium  
29 GC, Thermo Fisher) using RNAi Max (Invitrogen) according to manufacturer's instructions and cells  
30 were used for experiments 72 hours later.

31

### 32 **Phosphatase assay**

33 HEK293 cells were transfected with plasmids (pcDNA3.1 or pLenti7.3-V5 backbone) encoding V5-  
34 tagged human full-length paladin or mutant paladin (see Suppl figure 1a) using Lipofectamine 2000  
35 (Invitrogen). As controls wild type PTEN (28298 by Addgene), phosphatase-dead mutant PTEN C124S  
36 (28300 by Addgene) or  $\beta$ -galactosidase (pLenti7.3/V5-GW/lacZ by Invitrogen) were used. Cells were  
37 washed twice with 1xTBS and lysed (0.5% Triton X-100, 0.5% sodium deoxycholate, 150 mM NaCl,  
38 20 mM Tris, pH 7.4, 1x protease inhibitor cocktail [Roche] or 20 mM HEPES, 150 mM NaCl, 1% NP40,  
39 1x protease inhibitor cocktail [Roche]) and immunoprecipitation was performed with antibodies  
40 targeting the V5-tag of paladin constructs (Invitrogen) or FLAG-tag of PTEN constructs (F3165,  
41 Sigma). As a positive control in protein phosphatase assays endogenous TC-PTP was  
42 immunoprecipitated (6F3 clone, MediMabs). After 2h at 4°C, lysates were incubated with Protein-G  
43 sepharose beads (GE Healthcare) for 45 min at 4°C. Subsequently, beads were washed twice with lysis  
44 buffer and once with assay buffer (25 mM Tris-HCl, 140 mM NaCl, 2.7 mM KCl, 10 mM DTT or  
45 SHIP2 reaction buffer [Echelon]) and resuspended in 100  $\mu$ l (for triplicates) or 65  $\mu$ l (for duplicates) of  
46 assay buffer (one 10-cm dish of HEK293 cells per triplicate or two duplicates).

47 Phosphoinositide phosphates (Echelon, diC8) and inositol phosphates (Echelon, IP<sub>6</sub> by Merck) were  
48 suspended in assay buffer at 3000 pmol/well. The protein to be tested (30  $\mu$ l of immunocomplexes) was  
49 added and the reaction was stopped after 20-90 min depending on phosphoinositide to be tested by  
50 adding an equal volume of molybdate dye solution (V2471 Promega) and after 15 min incubation at RT  
51 absorbance at 600 nm was measured. Released phosphate was calculated by comparison to the amount  
52 of free phosphate in positive control (3000 pmol of K<sub>2</sub>PO<sub>4</sub>). The colorimetric assay was performed in  
53 96-well half area plates (Costar # 3690).

54 Phosphopeptide phosphatase activity was assessed by the radioactive assay using src-optimal peptide  
55 and PKC-optimal peptide as previously described<sup>2</sup>.

56

#### 57 **PIP-array**

58 PIP-Array membrane (Echelon) was blocked with 3% fatty-acid free BSA (Roche) in 1x PBS, 0.1%  
59 Tween (1x PBST) and incubated at 4°C overnight with 500 ng/ml of recombinant GST-tagged paladin  
60 protein (Abnova). After washing with 1xPBST, membrane was incubated at 4°C overnight with paladin  
61 antibody (HPA17343, Atlas antibodies). After secondary antibody incubation membrane was developed  
62 using enhanced chemiluminescence (GE Healthcare) with ChemiDoc MP Imaging System (Biorad  
63 Laboratories).

64

#### 65 **Intracellular localization of Paladin**

66 For visualization of PI(4)P and Paladin in HDMECs, cells were serum-starved for 2 hours and stimulated  
67 for 15 min. with mVEGF-A<sub>164</sub>, or left unstimulated. Cells were fixed and stained as described for  
68 visualization of the Golgi compartment<sup>3</sup>.

69 For visualization of Paladin, VEGFR2 and Rab-GTPases, HDMECs were infected with baculoviruses  
70 encoding Rab4-cherry, Rab7-cherry and Rab11-cherry<sup>4</sup>. Confluent HDMEC seeded on gelatine-coated  
71 8-well chamber slides (BD Falcon) were infected with baculovirus (10% of cell culture medium) for 8  
72 hours. The following day cells were starved overnight, stimulated for indicated time with VEGF-A and  
73 fixed in 2% paraformaldehyde (PFA) for 10 min on ice.

74 For immunostainings, cells were stimulated as described, fixed with 4% PFA or with cold methanol for  
75 10-15 minutes, permeabilized if needed with 0.2% Triton-X-100 for 10 minutes and blocked in 0.2%  
76 Tween 20/3% BSA/5% FCS/0.05% Sodium Deoxycholate in PBS, or in 3% BSA-1xPBS and incubated  
77 with primary antibodies overnight at 4°C. After washing samples were incubated with fluorophore  
78 conjugated secondary antibodies (Jackson Immunoresearch) and Hoechst 33342 to visualize nuclei.  
79 Following antibodies were used: Anti-EEA1 (1:200, BD Bioscience, 610457), anti-Giantin (1:500,  
80 Alexis, AXL-804-600, or 1:100 Abcam ab24586), anti-paladin (1:50, Atlas, HPA015696), anti-PI(4)P  
81 (1:200, Z-P004 Echelon), anti-VE-Cadherin (1:200 R&D System, AF1002) and anti-VEGFR2 (1:100

82 R&D Systems, AF357). All samples were mounted using Fluoromount-G (SouthernBiotech) or  
83 ProLong Gold (Invitrogen).

84

85 Cells were imaged with Zeiss LSM700 or Leica SP8 confocal microscopes. Image acquisition was done  
86 with 40x and 63x objectives. Super-resolution images were acquired with Zeiss LSM710 SIM. Images  
87 were processed and quantified with ImageJ software (NIH) or Cell Profiler (Broad Institute)<sup>5</sup>.

88

### 89 **Immunoprecipitation and western blotting**

90 Cells were washed once with cold 1xPBS and lysed in cell lysis buffer (0.02 M HEPES pH 7.5, 0.15 M  
91 NaCl, 1% [w/v] NP 40, 1 mM Na<sub>3</sub>VO<sub>4</sub>, in PBS and 1x Protease Inhibitor Cocktail (Roche)).

92 For *in vivo* signalling study, dog VEGF-A<sub>165</sub> (5 µg/20 g body weight) was administrated via the tail vein  
93 and mice were sacrificed after 1-20 min circulation time, lung and heart were removed immediately and  
94 snap frozen. Control mice received an equal volume of PBS. Snap frozen tissue was lysed in 1% NP-  
95 40, 1% sodium deoxycholate, 0.01 M NaP<sub>i</sub>, 150 mM NaCl, 2 mM EDTA, 1 mM Na<sub>3</sub>VO<sub>4</sub>, 1x Protease  
96 Inhibitor Cocktail (Roche), or in 20 mM HEPES, 150 mM NaCl, 1% NP-40 with 2 mM Na<sub>3</sub>VO<sub>4</sub> and  
97 2.5x Protease Inhibitor Cocktail (Roche), homogenized with Tissue Tearor (BioSpec Products) and  
98 sonicated six to eight times for 5 sec at 200 W (Bioruptor, diagenode). After one-hour incubation at 4°C,  
99 tissue lysates were centrifuged at 21'100 g for 20 min. Protein concentration was measured with the  
100 BCA protein detection kit (Thermo Fisher Scientific).

101 For immunoprecipitation, lysates were pre-cleared for 2 h at 4°C with unspecific goat IgG (Jackson  
102 Immuno Research) and Protein-G sepharose 4 Fast Flow beads (GE Healthcare) and incubated overnight  
103 at 4°C with goat anti-mouse VEGFR2 (R&D, AF644) or goat anti-human VEGFR2 (R&D, AF357).  
104 The lysates were incubated with Protein-G sepharose beads for 1 h at 4°C and subsequently the beads  
105 were washed five times with lysis buffer and denatured in 2x sample buffer (LifeTechnologies) at 95°C  
106 for 5 min.

107 Proteins were separated on a 4-12% BisTris polyacrylamide gel (Novex by Life Technologies) and  
108 transferred to an Immobilon-P PVDF membrane (Millipore) using the Criterion Blotter system  
109 (BioRad). The membrane was blocked with 5% skimmed milk in TBS 0.1% Tween, or with 5% BSA

110 in TBS 0.1% Tween for anti-phospho antibodies and incubated overnight at 4°C. Following antibodies  
111 were used. Rabbit anti-paladin (1:1000; Atlas Antibodies, HPA017343), rabbit anti-phospho-VEGFR2  
112 pY1175 (1:1000, Cell Signaling, 2478), rabbit anti-VEGFR2 (1:1000, Cell Signaling, 2479), rabbit anti-  
113 phospho-PLC $\gamma$  pY783 (1:1000, Invitrogen, 44-696G), rabbit anti-PLC $\gamma$  (1:1000, Cell Signaling, 2822),  
114 rabbit anti-phospho-Erk1/2 pThr202/pTyr204 (1:1000, Cell Signaling, 4377), rabbit anti-Erk1/2  
115 (1:1000, Cell Signaling, 9102), rabbit anti-phospho-Akt pSer473 (1:1000, Cell Signaling, 4060), rabbit  
116 anti-Akt (1:1000, Cell Signaling, 9272), rabbit anti-phospho-Src pTyr416 (1:1000, Cell Signaling,  
117 6349), rabbit anti-phospho-Src pTyr527 (1:1000, Cell Signaling, 2105), rabbit anti-Src (1:1000 Cell  
118 Signaling, 2123) and or goat anti-actin (1:1000, Santa Cruz, sc1615). Membranes were washed in TBS  
119 0.1% Tween and incubated with horseradish peroxidase (HRP) conjugated secondary anti-rabbit  
120 (1:10'000, GE Healthcare) or anti-goat antibodies (1:10'000, Invitrogen), respectively. Membranes  
121 were washed in TBS 0.1% Tween and developed using ECL prime (GE Healthcare). Luminescence  
122 signal was detected by the ChemiDoc MP system (BioRad) and densitometry performed using Image  
123 Lab software (BioRad).

124

### 125 **Surface biotinylation assay**

126 For assessment of surface-bound VEGFR2 levels after VEGF-A stimulation, siRNA transfected  
127 HDMECs were starved for two hours in basic endothelial cell medium (PromoCell) with only 0.1% FBS  
128 and stimulated with recombinant VEGF-A<sub>164</sub> (50 ng/ml) for indicated time points. Cells were washed  
129 twice with cold 1xDPBS (containing Mg<sup>2+</sup> and Ca<sup>2+</sup>) and biotinylated with 0.5 mg/ml EZ-Link Sulfo-  
130 NHS-Biotin (Thermo Scientific) in DPBS at 4°C for 45 minutes with gentle shaking. The reaction was  
131 stopped by washing twice with cold DPBS and incubation with cold 100 mM glycine in DPBS for 10  
132 minutes on ice. Subsequently, the cells were washed and lysed in modified RIPA buffer (20 mM HEPES,  
133 150 mM NaCl, 1% NP-40) with protease (Roche) and phosphatase inhibitors (1 mM Na<sub>3</sub>VO<sub>4</sub>).

134 For assessment of the VEGFR2 internalized pool after VEGF-A stimulation, biotinylation of cells  
135 surface receptors was performed prior to VEGF-A stimulation as described above. Cells were stimulated  
136 with VEGF-A<sub>164</sub> (50 ng/ml) for indicated time points. Cells were washed in cold 1x DPBS and cell-  
137 surface biotin was cleaved off by incubating the cells on ice with 100 mM of membrane impermeable

138 reducing agent MESNA (2-mercaptoethane sulfonic acid) (Sigma) in stripping buffer (50 mM Tris, pH  
139 8.6, 150 mM NaCl, 1mM EDTA, 0.2% BSA (pH 8.6) for 3x 15 minutes. After washing cells were lysed  
140 with RIPA buffer as described above.

141 Equal amounts of protein lysates were immunoprecipitated with streptavidin sepharose beads (GE  
142 Healthcare) overnight at 4°C after which beads were washed extensively with RIPA buffer and  
143 suspended in 2x NuPAGE LDS Sample Buffer (Invitrogen) with NuPAGE Sample Reducing Agent  
144 (Invitrogen). Protein separation and western blotting was performed as described above.

145

### 146 **Retina preparation, whole mount staining and imaging**

147 Eyes were harvested and either fixed in 4% PFA for 10 min at RT, dissected and post-fixed in ice-cold  
148 methanol for at least 2 h (pErk; for filopodia analysis), fixed with 2% PFA for 5 h (Erg), 4% PFA for  
149 1h at RT (CyclinD1) or fixed with 1% PFA, 0.1% triethanolamine, 0.1% TritonX-100, 0.1% NP-40 for  
150 2 hours at RT, retinas dissected and post-fixed in ice-cold methanol for 2 h (VEC). After rehydration  
151 retinas were permeabilized and blocked (0.1-0.5% Triton-X100, 0.05% sodium deoxycholate, 1% BSA,  
152 2% FBS, 0.02% sodium azide in PBS, or 0.3% Triton-X100, 3% FBS, 3% donkey serum) for 1-2 h at  
153 RT and stained overnight at 4°C using the following antibodies: rabbit anti-Erg (1:300, Abcam,  
154 ab92513), rabbit anti-cyclinD1 (1:50, Thermo Scientific RM-9104), rabbit anti-pERK1/2 (1:100, Cell  
155 Signaling #9101), rat anti-VEC (1:100, BD 555298) and rabbit anti- pY685 VEC (1:50, kind gift from  
156 Elisabetta Dejana<sup>3</sup>). After washing, retinas were incubated with appropriate fluorophore-coupled  
157 secondary antibodies and fluorophore conjugated isolectinB4 (Jackson Immunoresearch) or washed in  
158 PBlec (1% Triton X-100, 0.1 mM CaCl<sub>2</sub>, 0.1 mM MgCl<sub>2</sub>, 0.1 mM MnCl<sub>2</sub> in PBS at pH 6.8) for at least  
159 1 hour at RT and stained with biotinylated isolectinB4 (Sigma) overnight at 4°C and incubated with  
160 Streptavidin-Alexa 488 (Invitrogen). Retinas were flat-mounted in Fluoromount-G (Southern Biotech),  
161 or in ProLong Gold (Invitrogen).

162

163 Images were acquired with LSM700, AxioImager M2 microscope (Zeiss) or Leica SP8 confocal  
164 microscopes. Image acquisition was done with 5x (for the tile scans), 10x, 20x, 40x and 63x objectives.

165 Images were processed and quantified with ZEN software (Zeiss), LAS (Leica), ImageJ software (NIH)  
166 or Cell Profiler (Broad Institute)<sup>4</sup>.

167

### 168 **Oxygen-induced retinopathy (OIR) model**

169 A litter of P7 pups and their mother and/or foster mother were exposed to 75% oxygen in a semi-sealed  
170 oxygen chamber (ProOx 110 sensor and A-Chamber, Biospherix, Parish, NY) from P7 to P12, followed  
171 by room oxygen from P12 to P15-P17. Pups were sacrificed at indicated time point and the eyes were  
172 collected. To assess vascular permeability following OIR, P17 pups were warmed under a heat lamp  
173 and then 50  $\mu$ l of green fluorescent microspheres (1% solution of 25 nm FITC conjugated microsphere  
174 Fluoro-MAX G25, Thermo scientific, Fremont, CA) were injected via tail vein using a 30-gauge insulin  
175 syringe while the mice were under temporary isoflurane anaesthesia. Following injection, microspheres  
176 were allowed to circulate for 15 minutes before the mice were once more placed under isoflurane  
177 anaesthesia. PBS was flushed through the vasculature via cardiac perfusion to remove excess  
178 microspheres, which had not extravasated followed by 4% PFA for tissue fixation. Eyes were enucleated  
179 and fixed in 4% PFA at RT for 30 minutes before the retinas were dissected and immunostained with  
180 isolectinB4 conjugated to Alexa647 and pERK1/2 as described.

181 To visualize Pald1 expression after OIR, eyes from P17 pups were collected and processed for lacZ  
182 staining as described below.

183

### 184 **Intravitreal injections and lacZ staining of retinas**

185 10-week old female mice were anesthetized with isoflurane (AbbVie, Sweden). Prior to injection, the  
186 pupil was dilated with a drop of tropicamide (0.5% mydracyl). A single injection of 1 $\mu$ g dog VEGF-  
187 A<sub>164</sub> (1  $\mu$ l injection volume) into the intravitreal space was done using a Hamilton syringe (Microliter  
188 #701RN with 34 gauge/25 mm/pst4 removable needle). The eyes were collected 72 h after injection and  
189 processed for lacZ staining.

190 For lacZ staining eyes were fixed in 0.4% PFA for 4 h at RT, retinas were dissected and permeabilized  
191 by washing three times for 20 min with detergent rinse (2 mM MgCl<sub>2</sub>, 0.01% sodium deoxycholate,  
192 0.02% Nonidet P-40, PBS). Retinas were stained with 1 mg/ml x-gal (Promega) diluted in staining

193 solution (detergent rinse containing 5 mM potassium ferricyanide, 5 mM potassium ferrocyanide) at  
194 37°C overnight, protected from light. Retinas were washed twice for 10 min in detergent rinse, followed  
195 by two PBS washes and post-fixation with 4% PFA for 1 h at RT and mounted in Fluoromount-G  
196 (Southern Biotech). Images were acquired with AxioImager M2 (Zeiss).

197

### 198 **Quantitative real-time PCR**

199 Eyes were collected from P4 and P5 pups and placed in RNAlater<sup>®</sup> solution (Ambion) immediately after  
200 collection. RNA was isolated using the RNeasy Micro Kit (Qiagen) and processed for quantitative real-  
201 time PCR as described previously<sup>6</sup>. The TaqMan Assays (Applied Biosystems) used: *Gapdh*  
202 (4352932E), *Ccnd1* (Mm00432359\_m1, n=10/11).

203

204

205 **ONLINE REFERENCES**

- 206 1. Wallgard, E., *et al.* Paladin (X99384) is expressed in the vasculature and shifts from  
207 endothelial to vascular smooth muscle cells during mouse development. *Dev Dyn* **241**, 770-  
208 786 (2012).
- 209 2. Sorby, M., Sandstrom, J. & Ostman, A. An extracellular ligand increases the specific activity of  
210 the receptor-like protein tyrosine phosphatase DEP-1. *Oncogene* **20**, 5219-5224 (2001).
- 211 3. Hammond G.R *et al.* Immunocytochemical techniques reveal multiple, distinct cellular pools  
212 of PtdIns4P and PtdIns(4,5)P(2). *Biochem J.* 2009 422(1):23-35.  
213
- 214 4. Orsenigo, F., *et al.* Phosphorylation of VE-cadherin is modulated by haemodynamic forces  
215 and contributes to the regulation of vascular permeability in vivo. *Nat Commun* **3**, 1208  
216 (2012).
- 217 5. Lamprecht, M.R., Sabatini, D.M. & Carpenter, A.E. CellProfiler: free, versatile software for  
218 automated biological image analysis. *Biotechniques* **42**, 71-75 (2007).
- 219 6. Wallgard, E., *et al.* Paladin (X99384) is expressed in the vasculature and shifts from  
220 endothelial to vascular smooth muscle cells during mouse development. *Dev Dyn* **241**, 770-  
221 786 (2012).  
222



## Figure 1

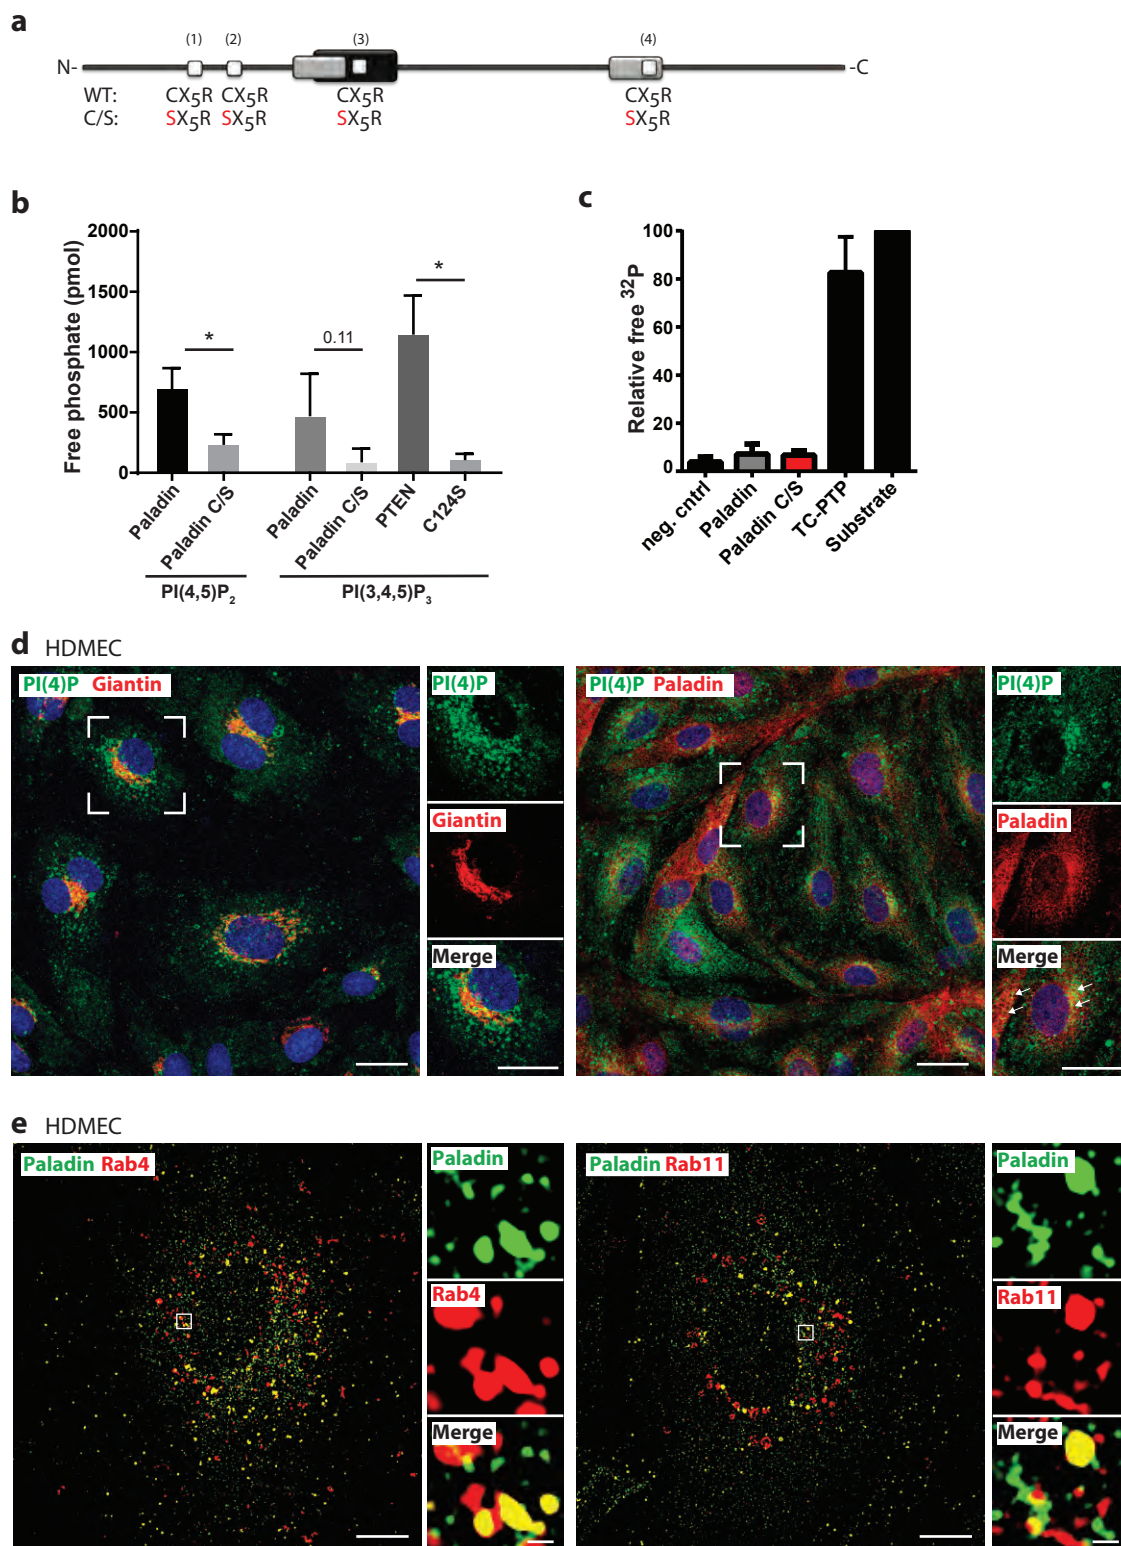

Figure 2

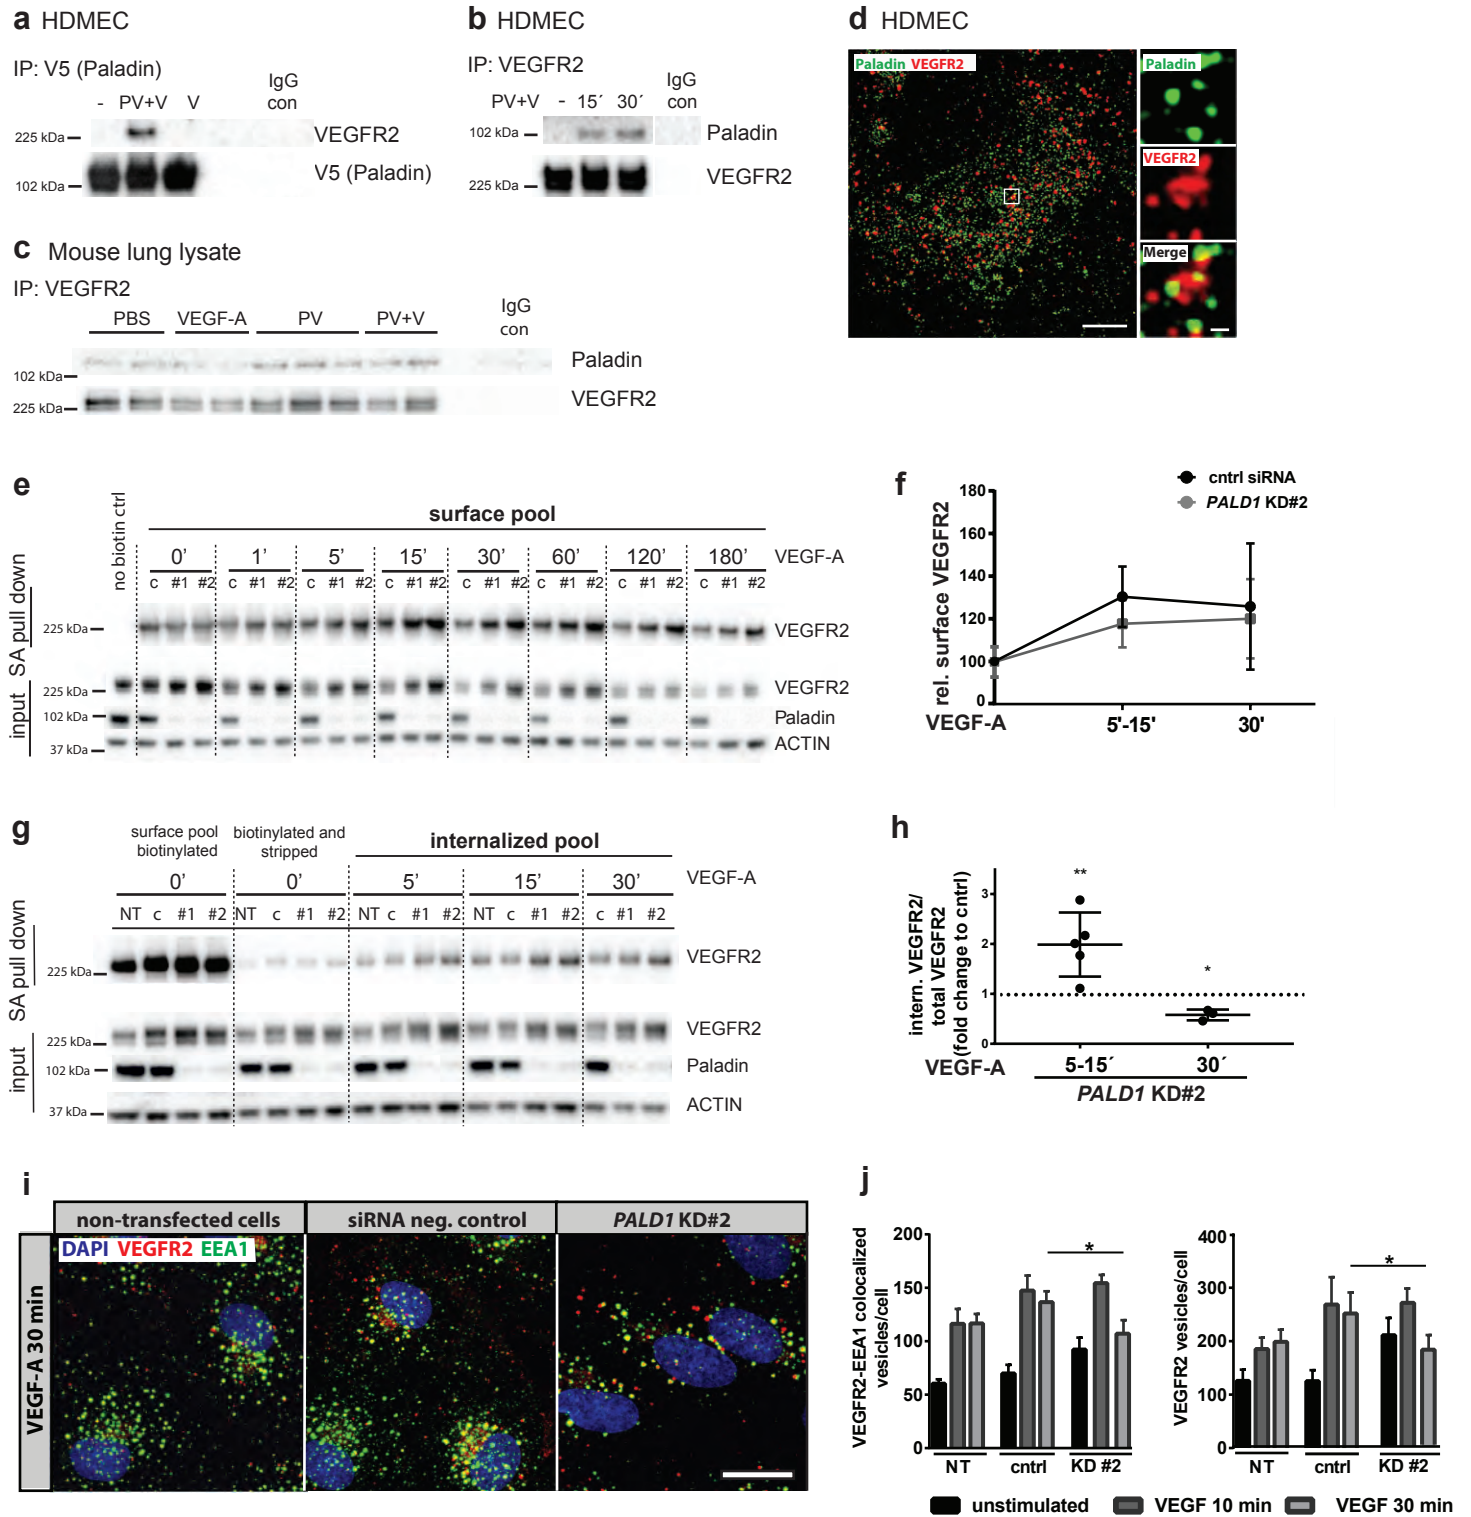

Figure 3

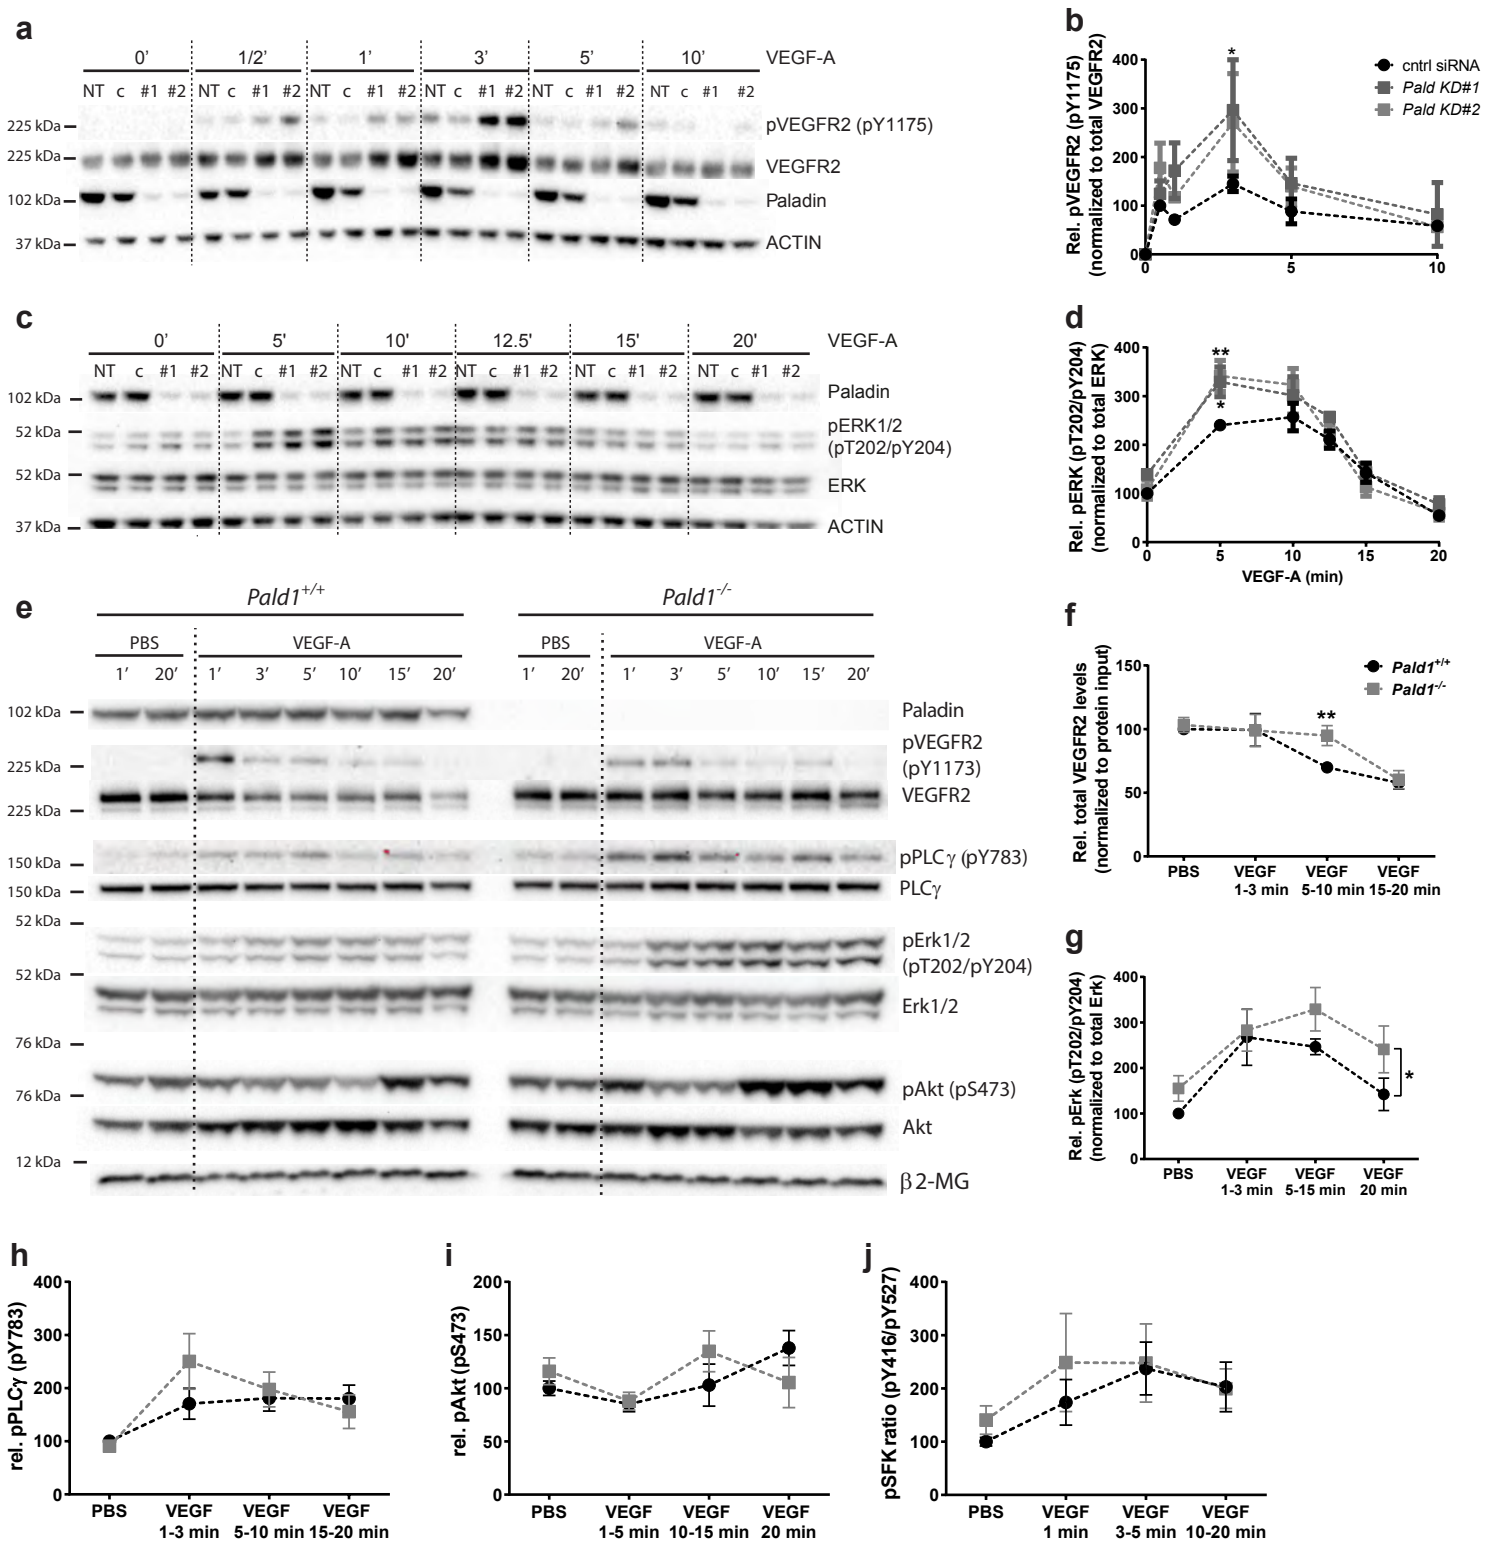

Figure 4

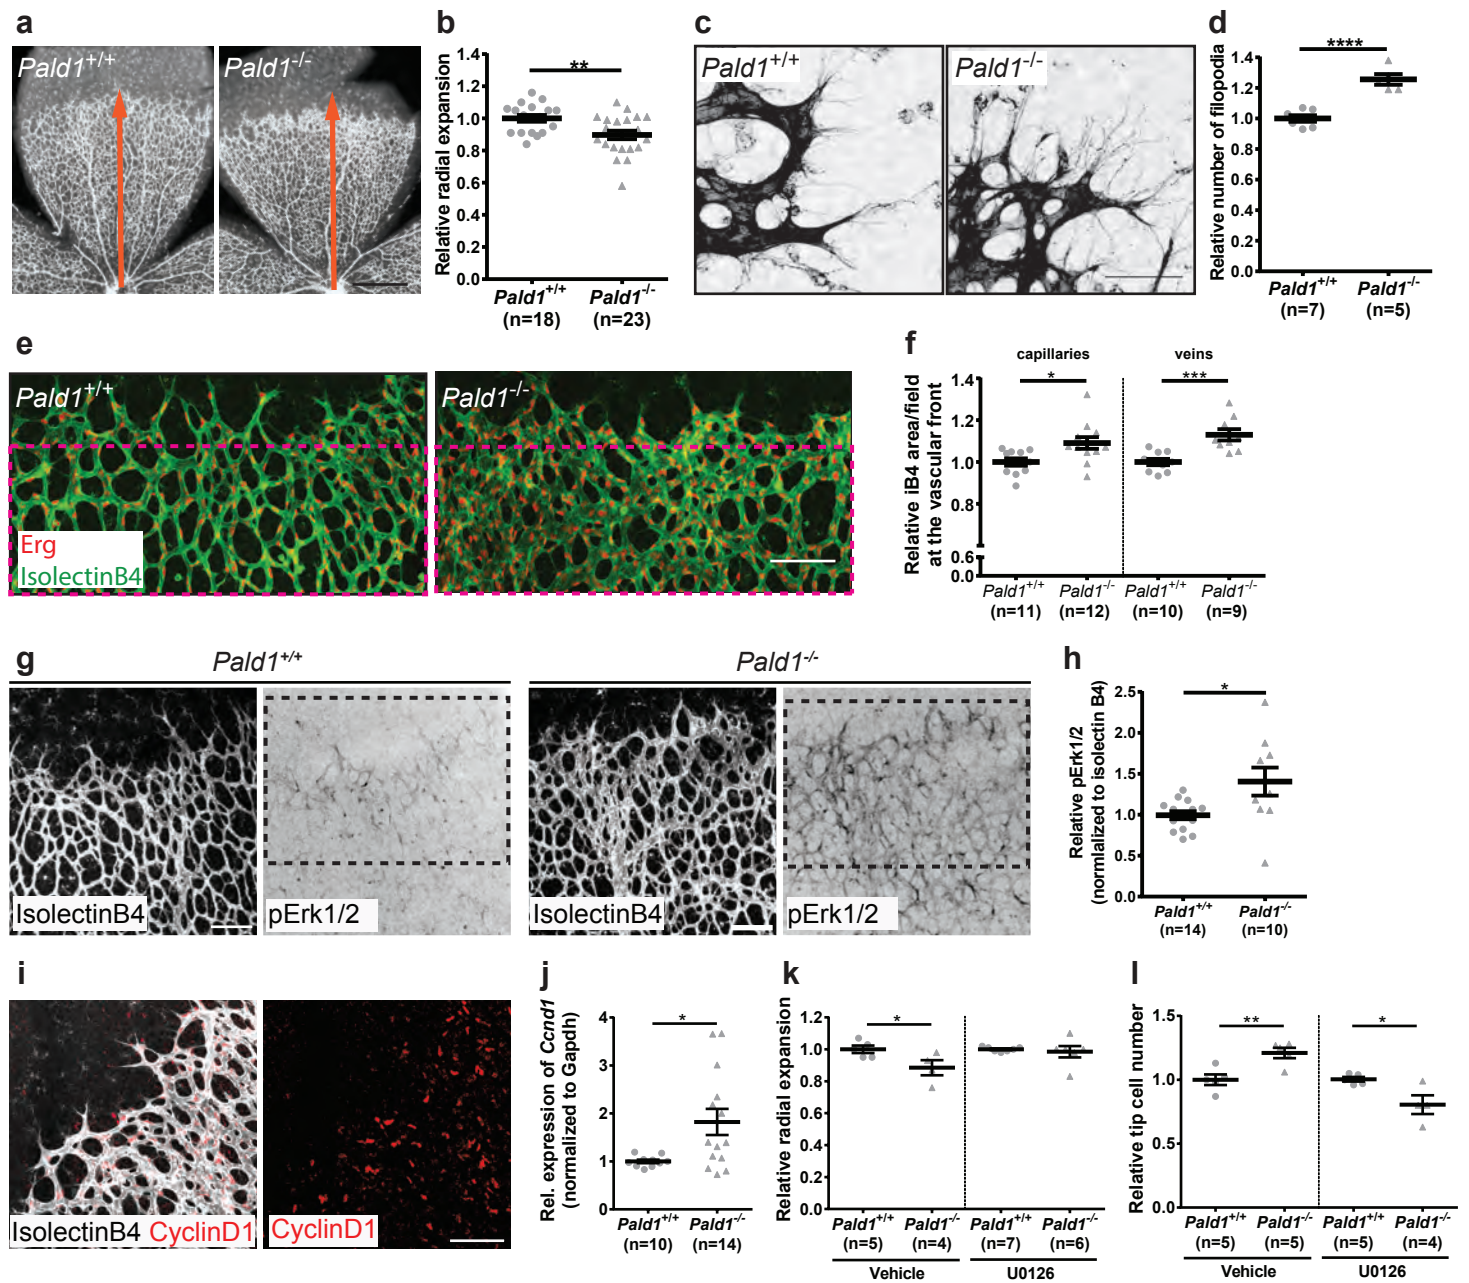

Figure 5

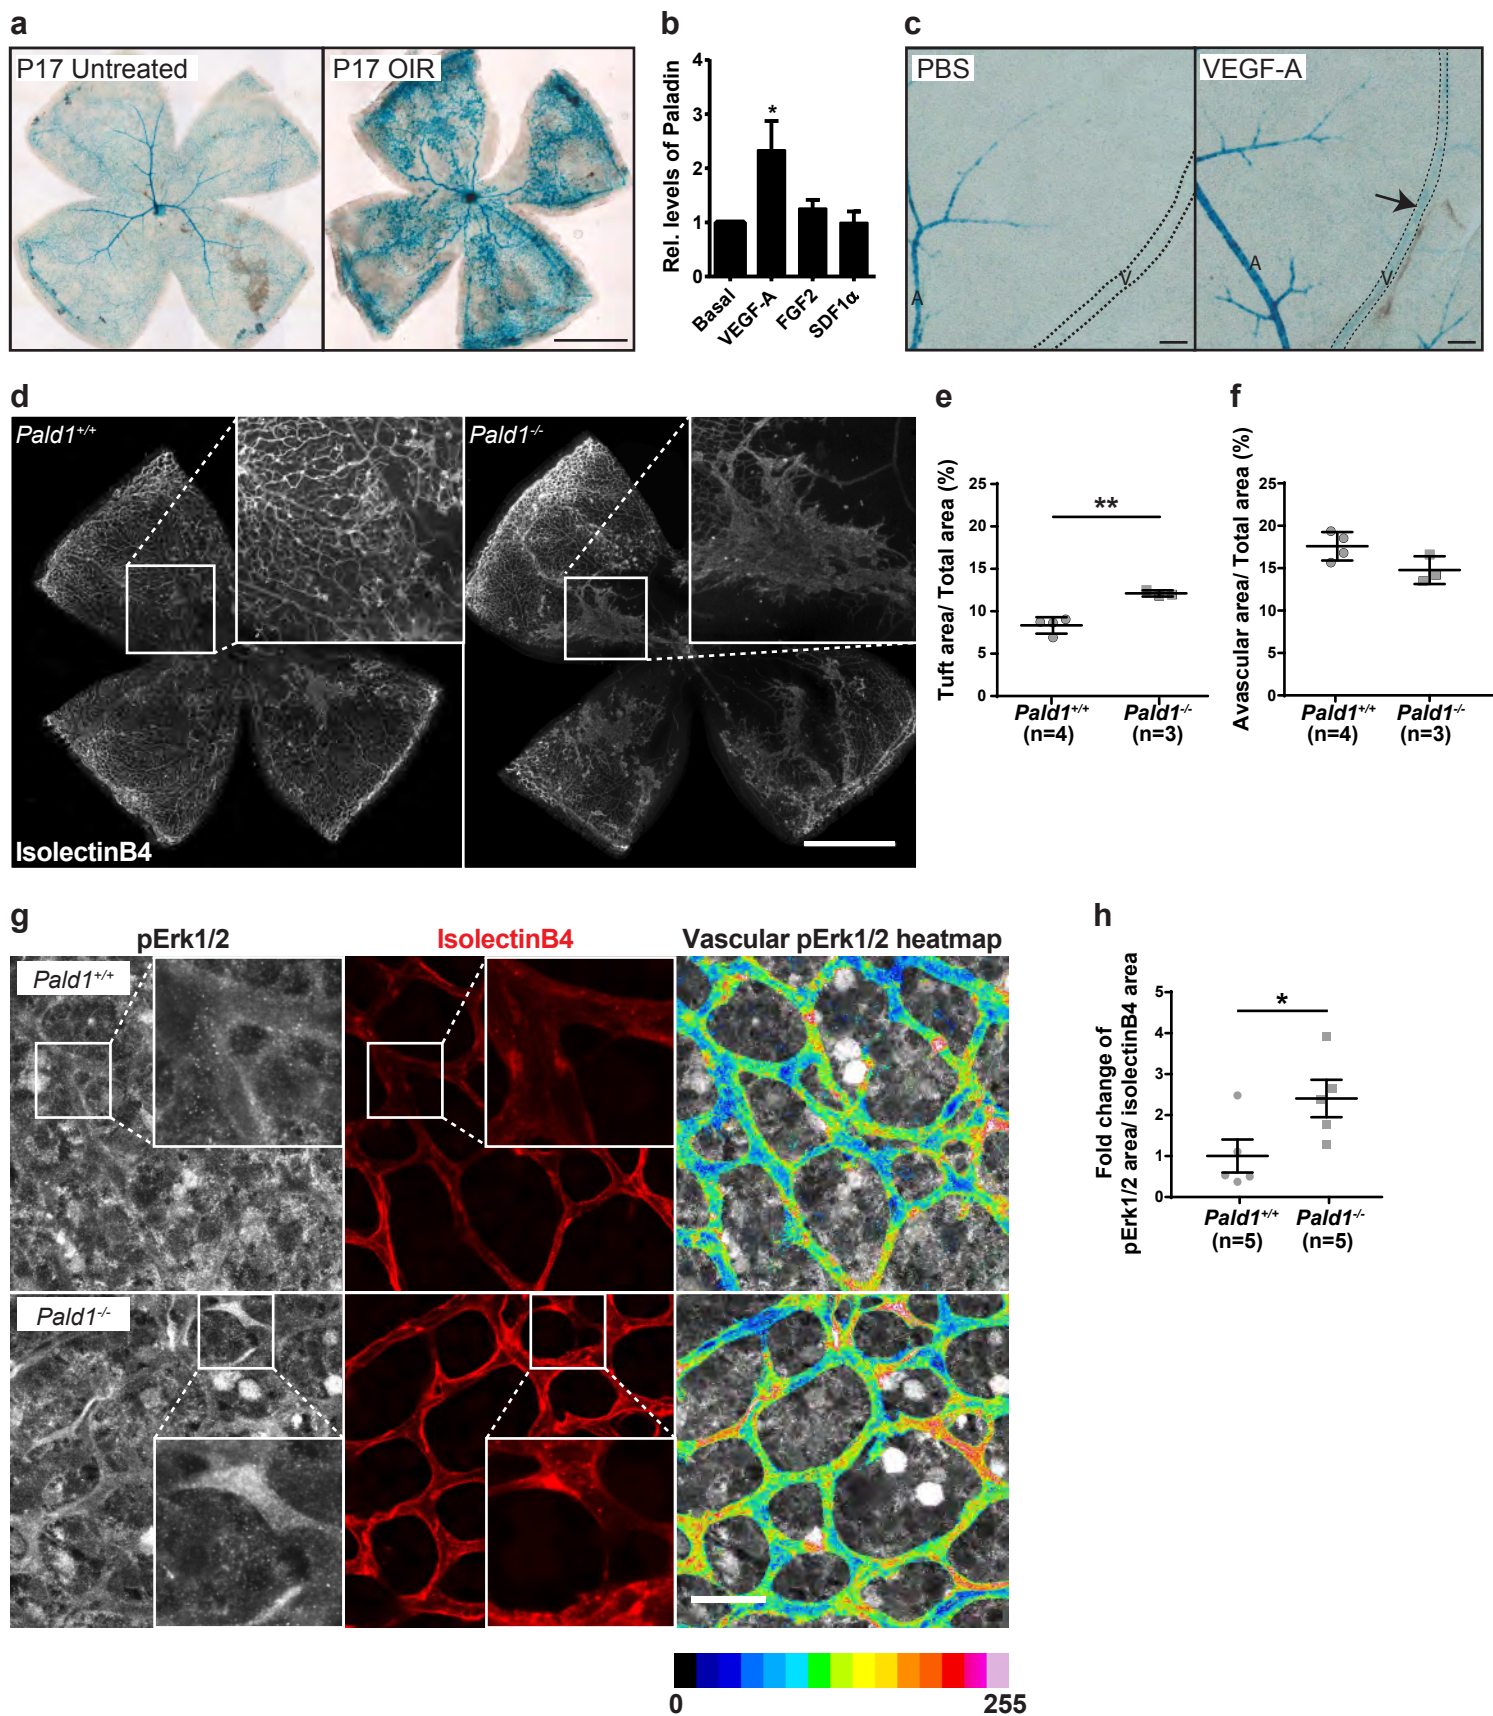

Source: https://www.biorxiv.org/content/biorxiv/early/2020/02/12/2020.02.11.943183.full.pdf
